# Supplementary material
Source: Research Square preprint supplement (doi:10.21203/rs.3.rs-9031987/v1)
Supplement: Supplementary file 1 [file 7f900c750d0aeb3259a0db6f.docx]

# SUPPLEMENTARY MATERIAL

# Dissociable Periodic and Aperiodic EEG Markers of Baseline Cognition and Treatment Response Following Exercise in Schizophrenia Spectrum Disorders

#

Yilmaz, Gottschewsky *et al.*

# Supplementary Methods

## Materials and Measures

Symptom severity was assessed using the Positive and Negative Syndrome Scale (PANSS; [1](https://www.zotero.org/google-docs/?TczA0a), including the positive, negative, and general psychopathology scores. Cognitive performance was measured with the Brief Assessment of Cognition in Schizophrenia (BACS; [2](https://www.zotero.org/google-docs/?mJOrXg), with analyses based on the composite score. We computed BACS scores following the scoring framework described in [2](https://www.zotero.org/google-docs/?51Vvvk) and [3](https://www.zotero.org/google-docs/?neXo1L)). Because BACS measures were available only for patients, all standardization procedures were performed using the patients' baseline values. For each BACS subtest, raw scores were standardized to z scores using the mean and standard deviation of the baseline values. Test-level scores were then obtained by averaging the standardized submeasures within each BACS domain (Verbal Memory, Digit Sequencing, Token Motor, Verbal Fluency, Symbol Coding, and Tower of London). The composite score was computed by averaging the six domain scores, provided that no more than one domain score was missing. Finally, the composite was restandardized to z units using the baseline distribution, yielding a composite with a mean of 0 and a standard deviation of 1.02 (deviating slightly from 1 due to four excluded subjects for the EEG analysis).

## EEG and ECG Data Acquisition and Processing

For resting state EEG (rsEEG) data acquisition, BrainVision Recorder was used. We recorded the data in a sound- and electrically- shielded Faraday cage that minimized external noise, using a 32-channel ActiCAP Ag/AgCl active electrode system as well as a BrainAmp amplifier (Brain Products GmbH, Germany). During the recording, we maintained all electrode impedances below 25 kΩ. 31 of the 32 channels were used for scalp EEG recording, while the Oz electrode was placed on the left lower back and used as a drop-down ECG electrode. We arranged the electrodes according to the International 10–20 electrode system with the FCz electrode as reference and AFz as ground, and recorded with a sampling rate of 500 Hz.

Each EEG session consisted of resting-state recordings during eyes-closed and eyes-open conditions, respectively, 5 minutes each. Participants were instructed to relax, stay awake and minimize movement during all recordings. In particular, they were instructed to keep their head still, avoid grinding their teeth, and squinting. In the eyes-open condition, they additionally fixated on a central fixation cross. We furthermore placed a Respiration Belt (Brain Products GmbH, Germany) around participants’ chests to track respiration during the whole experiment. The analysis regarding the ECG and respiration is beyond the scope of this paper and is covered elsewhere.

Data from each rsEEG session (eyes open/closed) were preprocessed using an automated in-house pipeline implemented in MATLAB (The MathWorks Inc.) with EEGLAB v2022.0 [4](https://www.zotero.org/google-docs/?jN7bS1). Data were re-referenced to the average and downsampled to 256 Hz. A 1–70 Hz bandpass filter and a 49.5–50.5 Hz notch filter were applied, after which data were segmented into 6-second epochs. Artefact removal followed a multi-step rejection procedure based on Adams et al. [5](https://www.zotero.org/google-docs/?IenPH1). Epochs exceeding ±5 standard deviations in mean amplitude, exhibiting linear trends (max slope = 5, min R² = 0.7), or showing abnormal low-frequency (<2 Hz, −50 to 50 dB) or high-frequency (20–40 Hz, −100 to 25 dB) power were removed. Channels were rejected based on extreme values in their power spectrum (−4 to 6 standard deviation, SD), kurtosis (−7 to 15 SD), and joint probability (−9 to 7 SD). If more than 50% of epochs were rejected at this stage, operations were repeated on initial data in reverse order (channel rejection first and epoch rejection second). datasets with >50% rejected epochs or >20% rejected channels after this step were excluded. Cleaned data were submitted to Independent Component Analysis (ICA), and artefactual components were removed using the Multiple Artifact Rejection Algorithm (MARA) [6](https://www.zotero.org/google-docs/?eLbzDi). A second round of automatic epoch and channel rejection was then performed with slightly stricter thresholds (spectrum −6 to 5 SD, kurtosis −6 to 9 SD, joint probability −7 to 7 SD). Removed channels were interpolated, and the final epoched data were converted back to continuous EEG for subsequent analyses.
 Power spectral density (PSD) was computed using the Welch method with 6-second windows and 50% overlap in MNE Python v1.8.0 [7](https://www.zotero.org/google-docs/?lo6C2W).

PSD was extracted for all scalp electrodes and subsequently averaged into seven predefined functional regions of interest (ROIs) to evaluate topographical variations in neural dynamics: Frontal (Fp1, Fp2, F3, F4, Fz), Central (C3, C4, Cz, FC1, FC2), Parietal (P3, P4, Pz, P9, P10), Left Temporal (T7, TP9), Right Temporal (T8, TP10), and Occipital (O1, O2). Additionally, a Global metric was calculated by averaging across the entire electrode montage. PSDs were parameterized using the *specparam* Python library ([Donoghue et al., 2020](https://www.zotero.org/google-docs/?KOV7wr)). This approach allows the separation of periodic oscillatory activity from the aperiodic (1/f-like) component, reducing confounding influences of broadband spectral shifts on band-limited power estimates. For each electrode, spectral parameterization was performed in the 1–70 Hz range to extract periodic theta power and periodic iAPF, and in the 30–48 Hz range to extract the aperiodic exponent. Parameterization used the following settings: peak_width_limits = [1, 10], maximum_n_peaks = 8, min_peak_height = 0.1, peak_threshold = 2, and aperiodic_mode = “fixed.” Global and regional values were computed by averaging across all or region-specific electrodes, respectively. In accordance with our predefined rule, average values were set to missing (NA) if more than half of the electrodes contributing to a given average measure were missing (e.g., undetected peaks for periodic measures). Our main EEG variables of interest for this study consisted of theta power (4-8 Hz), iAPF (8-12 Hz), and aperiodic exponent (30-48Hz).

References

[1.](https://www.zotero.org/google-docs/?S42Gij) [Kay SR, Fiszbein A, Opler LA. The Positive and Negative Syndrome Scale (PANSS) for Schizophrenia. *Schizophr Bull*. 1987;13(2):261-276. doi:10.1093/schbul/13.2.261](https://www.zotero.org/google-docs/?S42Gij)

[2.](https://www.zotero.org/google-docs/?S42Gij) [Keefe R. The Brief Assessment of Cognition in Schizophrenia: reliability, sensitivity, and comparison with a standard neurocognitive battery. *Schizophr Res*. 2004;68(2-3):283-297. doi:10.1016/j.schres.2003.09.011](https://www.zotero.org/google-docs/?S42Gij)

[3.](https://www.zotero.org/google-docs/?S42Gij) [Keefe R, Harvey P, Goldberg T, et al. Norms and standardization of the Brief Assessment of Cognition in Schizophrenia (BACS). *Schizophr Res*. 2008;102(1-3):108-115. doi:10.1016/j.schres.2008.03.024](https://www.zotero.org/google-docs/?S42Gij)

[4.](https://www.zotero.org/google-docs/?S42Gij) [Delorme A, Makeig S. EEGLAB: an open source toolbox for analysis of single-trial EEG dynamics including independent component analysis. *J Neurosci Methods*. 2004;134(1):9-21. doi:10.1016/j.jneumeth.2003.10.009](https://www.zotero.org/google-docs/?S42Gij)

[5.](https://www.zotero.org/google-docs/?S42Gij) [Adams RA, Pinotsis D, Tsirlis K, et al. Computational Modeling of Electroencephalography and Functional Magnetic Resonance Imaging Paradigms Indicates a Consistent Loss of Pyramidal Cell Synaptic Gain in Schizophrenia. *Biol Psychiatry*. 2022;91(2):202-215. doi:10.1016/j.biopsych.2021.07.024](https://www.zotero.org/google-docs/?S42Gij)

[6.](https://www.zotero.org/google-docs/?S42Gij) [Winkler I, Haufe S, Tangermann M. Automatic classification of artifactual ICA-components for artifact removal in EEG signals. *Behav Brain Funct BBF*. 2011;7:30. doi:10.1186/1744-9081-7-30](https://www.zotero.org/google-docs/?S42Gij)

[7.](https://www.zotero.org/google-docs/?S42Gij) [Gramfort A, Luessi M, Larson E, et al. MNE software for processing MEG and EEG data. *NeuroImage*. 2014;86:446-460. doi:10.1016/j.neuroimage.2013.10.027](https://www.zotero.org/google-docs/?S42Gij)

[8.](https://www.zotero.org/google-docs/?S42Gij) [Donoghue T, Haller M, Peterson EJ, et al. Parameterizing neural power spectra into periodic and aperiodic components. *Nat Neurosci*. 2020;23(12):1655-1665. doi:10.1038/s41593-020-00744-x](https://www.zotero.org/google-docs/?S42Gij)
