# Supplementary material
Source: Research Square preprint supplement (doi:10.21203/rs.3.rs-9031987/v1)
Supplement: Supplementary file 2 [file 9593c9ee41f04ce8449c85ec.xlsx]

## Sheet: Abbreviations
Abbreviation	Explanation
SSD	Schizophrenia Spectrum Disorders
HC	Healthy Controls
iAPF	Individual alpha peak frequency / also denoted as center frequency
Theta (4-8 Hz)	Theta power in the 4-8 Hz frequency range
Exponent (30-48 Hz)	Slope of the aperiodic exponent in the 30-48 Hz frequency range
EC	Eyes-closed
EO	Eyes-open
FDR	False Discovery Rate
CPZ Equivalent / CPZeq	Chlorpromazine equivalent dosis
BACS	The Brief Assessment of Cognition in Schizophrenia composite score
PANSS pos	Positive and Negative Syndrome Scale - positive symptoms subscale
PANSS neg	Positive and Negative Syndrome Scale - negative symptoms subscale
PANSS gen	Positive and Negative Syndrome Scale - general symptoms subscale
SE	Standart error
df	Degrees of freedom

## Sheet: Table S1. Number of patients Se
Table S1. Number of patients per outcome, condition and session
Outcome	Condition	Baseline (n)	Post-Intervention (n)
Exponent 30–48 Hz	Eyes-closed	59	39
Exponent 30–48 Hz	Eyes-open	60	39
Theta power 4–8 Hz	Eyes-closed	43	28
Theta power 4–8 Hz	Eyes-open	34	23
iAPF 8–12 Hz	Eyes-closed	59	39
iAPF 8–12 Hz	Eyes-open	56	37

## Sheet: Table S2. Global - Group Differ
Table S2. Baseline Group Differences Between SSD and HC: Linear Mixed-Effects Model Results for Confirmatory Global EEG Parameters
Specparam	Outcome	Term	N (ID/Obs)	Estimate (95% CI)	SE	t	df	p (uncorr.)		p (FDR)
Power	Theta (4-8 Hz)	Intercept	79 / 126	0.387 (0.193, 0.580)	0.1	3.99	73.44	< .001	***	< .001	***
Power	Theta (4-8 Hz)	Group (SSD)	79 / 126	-0.004 (-0.121, 0.112)	0.06	-0.07	84.99	0.942		0.942
Theta (4-8 Hz)		Condition (EO)	79 / 126	-0.109 (-0.179, -0.038)	0.04	-3.09	48.73	0.003	**	0.005	**
Power	Theta (4-8 Hz)	Age	79 / 126	0.004 (-0.001, 0.009)	0	1.73	72.93	0.088		0.132
Power	Theta (4-8 Hz)	Sex (Male)	79 / 126	-0.013 (-0.125, 0.099)	0.06	-0.23	71.65	0.816		0.816
Power	Theta (4-8 Hz)	Group (SSD) × Condition (EO)	79 / 126	-0.003 (-0.094, 0.087)	0.05	-0.07	47.28	0.942		0.984
Center frequency	iAPF (8-12 Hz)	Intercept	116 / 225	10.904 (10.552, 11.255)	0.18	61.38	122.53	< .001	***	< .001	***
Center frequency	iAPF (8-12 Hz)	Group (SSD)	116 / 225	-0.199 (-0.445, 0.047)	0.12	-1.59	168.98	0.113		0.338
Center frequency	iAPF (8-12 Hz)	Condition (EO)	116 / 225	0.166 (0.001, 0.332)	0.08	1.99	106.92	0.049	*	0.049	*
Center frequency	iAPF (8-12 Hz)	Age	116 / 225	-0.017 (-0.025, -0.008)	0	-3.71	111.19	< .001	***	< .001	***
Center frequency	iAPF (8-12 Hz)	Sex (Male)	116 / 225	-0.270 (-0.486, -0.054)	0.11	-2.48	110.61	0.015	*	0.022	*
Center frequency	iAPF (8-12 Hz)	Group (SSD) × Condition (EO)	116 / 225	0.113 (-0.129, 0.354)	0.12	0.92	108.19	0.357		0.984
Exponent	Exponent (30-48 Hz)	Intercept	116 / 231	2.128 (1.721, 2.535)	0.21	10.36	115.45	< .001	***	< .001	***
Exponent	Exponent (30-48 Hz)	Group (SSD)	116 / 231	-0.028 (-0.296, 0.240)	0.14	-0.21	131.42	0.836		0.942
Exponent	Exponent (30-48 Hz)	Condition (EO)	116 / 231	-0.269 (-0.374, -0.163)	0.05	-5.05	112.67	< .001	***	< .001	***
Exponent	Exponent (30-48 Hz)	Age	116 / 231	-0.007 (-0.018, 0.003)	0.01	-1.37	111.83	0.173		0.173
Exponent	Exponent (30-48 Hz)	Sex (Male)	116 / 231	-0.397 (-0.651, -0.143)	0.13	-3.1	111.73	0.002	**	0.007	**
Exponent	Exponent (30-48 Hz)	Group (SSD) × Condition (EO)	116 / 231	0.002 (-0.151, 0.154)	0.08	0.02	112.83	0.984		0.984

## Sheet: Table S3. Regional - Group Diff
Table S3. Baseline Group Differences Between SSD and HC: Linear Mixed-Effects Model Results for Exploratory Regional EEG Parameters
Region	Specparam	Outcome	Term	N (ID/Obs)	Estimate (95% CI)	SE	t	df	p (uncorr.)
Frontal	Center frequency	iAPF (8-12 Hz)	Intercept	115 / 221	10.934 (10.502, 11.366)	0.22	50.07	126.5	< .001	***
Frontal	Center frequency	iAPF (8-12 Hz)	Group (SSD)	115 / 221	-0.272 (-0.577, 0.032)	0.15	-1.76	175.01	0.08
Frontal	Center frequency	iAPF (8-12 Hz)	Condition (EO)	115 / 221	0.056 (-0.162, 0.274)	0.11	0.51	106.29	0.614
Frontal	Center frequency	iAPF (8-12 Hz)	Age	115 / 221	-0.019 (-0.029, -0.008)	0.01	-3.41	113.53	< .001	***
Frontal	Center frequency	iAPF (8-12 Hz)	Sex (Male)	115 / 221	-0.206 (-0.468, 0.056)	0.13	-1.56	110.94	0.123
Frontal	Center frequency	iAPF (8-12 Hz)	Group (SSD) × Condition (EO)	115 / 221	0.196 (-0.123, 0.515)	0.16	1.22	107.72	0.226
Frontal	Exponent	Exponent (30-48 Hz)	Intercept	116 / 231	1.975 (1.499, 2.452)	0.24	8.21	115.54	< .001	***
Frontal	Exponent	Exponent (30-48 Hz)	Group (SSD)	116 / 231	-0.028 (-0.343, 0.287)	0.16	-0.18	133.01	0.86
Frontal	Exponent	Exponent (30-48 Hz)	Condition (EO)	116 / 231	-0.251 (-0.380, -0.122)	0.07	-3.84	112.39	< .001	***
Frontal	Exponent	Exponent (30-48 Hz)	Age	116 / 231	-0.002 (-0.014, 0.010)	0.01	-0.35	111.56	0.73
Frontal	Exponent	Exponent (30-48 Hz)	Sex (Male)	116 / 231	-0.341 (-0.638, -0.044)	0.15	-2.27	111.45	0.025	*
Frontal	Exponent	Exponent (30-48 Hz)	Group (SSD) × Condition (EO)	116 / 231	-0.046 (-0.233, 0.140)	0.09	-0.49	112.56	0.623
Frontal	Power	Theta (4-8 Hz)	Intercept	89 / 146	0.437 (0.256, 0.619)	0.09	4.79	86.19	< .001	***
Frontal	Power	Theta (4-8 Hz)	Group (SSD)	89 / 146	0.041 (-0.075, 0.156)	0.06	0.7	104.33	0.488
Frontal	Power	Theta (4-8 Hz)	Condition (EO)	89 / 146	-0.150 (-0.224, -0.075)	0.04	-4.03	54.62	< .001	***
Frontal	Power	Theta (4-8 Hz)	Age	89 / 146	0.001 (-0.003, 0.006)	0	0.61	77.04	0.542
Frontal	Power	Theta (4-8 Hz)	Sex (Male)	89 / 146	0.018 (-0.086, 0.123)	0.05	0.35	75.41	0.726
Frontal	Power	Theta (4-8 Hz)	Group (SSD) × Condition (EO)	89 / 146	0.050 (-0.050, 0.150)	0.05	1	53.53	0.321
Central	Center frequency	iAPF (8-12 Hz)	Intercept	115 / 219	10.866 (10.472, 11.260)	0.2	54.6	121.57	< .001	***
Central	Center frequency	iAPF (8-12 Hz)	Group (SSD)	115 / 219	-0.157 (-0.434, 0.121)	0.14	-1.11	169.28	0.267
Central	Center frequency	iAPF (8-12 Hz)	Condition (EO)	115 / 219	0.237 (0.044, 0.430)	0.1	2.43	105.41	0.017	*
Central	Center frequency	iAPF (8-12 Hz)	Age	115 / 219	-0.018 (-0.028, -0.008)	0	-3.65	110.86	< .001	***
Central	Center frequency	iAPF (8-12 Hz)	Sex (Male)	115 / 219	-0.289 (-0.531, -0.048)	0.12	-2.38	109.75	0.019	*
Central	Center frequency	iAPF (8-12 Hz)	Group (SSD) × Condition (EO)	115 / 219	0.052 (-0.227, 0.330)	0.14	0.37	105.17	0.713
Central	Exponent	Exponent (30-48 Hz)	Intercept	116 / 231	2.647 (2.136, 3.157)	0.26	10.27	115.57	< .001	***
Central	Exponent	Exponent (30-48 Hz)	Group (SSD)	116 / 231	0.133 (-0.203, 0.468)	0.17	0.78	131.09	0.436
Central	Exponent	Exponent (30-48 Hz)	Condition (EO)	116 / 231	-0.191 (-0.322, -0.061)	0.07	-2.9	112.89	0.004	**
Central	Exponent	Exponent (30-48 Hz)	Age	116 / 231	-0.010 (-0.023, 0.003)	0.01	-1.46	112.04	0.146
Central	Exponent	Exponent (30-48 Hz)	Sex (Male)	116 / 231	-0.504 (-0.823, -0.185)	0.16	-3.13	111.94	0.002	**
Central	Exponent	Exponent (30-48 Hz)	Group (SSD) × Condition (EO)	116 / 231	-0.080 (-0.269, 0.109)	0.1	-0.84	113.04	0.402
Central	Power	Theta (4-8 Hz)	Intercept	94 / 165	0.386 (0.230, 0.543)	0.08	4.91	90.06	< .001	***
Central	Power	Theta (4-8 Hz)	Group (SSD)	94 / 165	0.038 (-0.061, 0.136)	0.05	0.75	104.45	0.452
Central	Power	Theta (4-8 Hz)	Condition (EO)	94 / 165	-0.118 (-0.169, -0.068)	0.03	-4.68	68.79	< .001	***
Central	Power	Theta (4-8 Hz)	Age	94 / 165	0.003 (-0.001, 0.007)	0	1.59	87.48	0.115
Central	Power	Theta (4-8 Hz)	Sex (Male)	94 / 165	0.004 (-0.088, 0.096)	0.05	0.09	86.11	0.931
Central	Power	Theta (4-8 Hz)	Group (SSD) × Condition (EO)	94 / 165	-0.013 (-0.084, 0.058)	0.04	-0.36	69.29	0.717
Parietal	Center frequency	iAPF (8-12 Hz)	Intercept	116 / 222	11.093 (10.699, 11.487)	0.2	55.7	126.3	< .001	***
Parietal	Center frequency	iAPF (8-12 Hz)	Group (SSD)	116 / 222	-0.198 (-0.483, 0.088)	0.14	-1.37	185.35	0.174
Parietal	Center frequency	iAPF (8-12 Hz)	Condition (EO)	116 / 222	0.045 (-0.173, 0.262)	0.11	0.41	106.25	0.685
Parietal	Center frequency	iAPF (8-12 Hz)	Age	116 / 222	-0.018 (-0.028, -0.008)	0	-3.63	111.86	< .001	***
Parietal	Center frequency	iAPF (8-12 Hz)	Sex (Male)	116 / 222	-0.195 (-0.434, 0.045)	0.12	-1.61	109.62	0.11
Parietal	Center frequency	iAPF (8-12 Hz)	Group (SSD) × Condition (EO)	116 / 222	0.200 (-0.114, 0.513)	0.16	1.26	106.37	0.209
Parietal	Exponent	Exponent (30-48 Hz)	Intercept	116 / 231	2.793 (2.345, 3.242)	0.23	12.34	116.71	< .001	***
Parietal	Exponent	Exponent (30-48 Hz)	Group (SSD)	116 / 231	-0.002 (-0.301, 0.296)	0.15	-0.02	137.66	0.987
Parietal	Exponent	Exponent (30-48 Hz)	Condition (EO)	116 / 231	-0.357 (-0.490, -0.223)	0.07	-5.3	112.71	< .001	***
Parietal	Exponent	Exponent (30-48 Hz)	Age	116 / 231	-0.009 (-0.021, 0.002)	0.01	-1.63	111.9	0.107
Parietal	Exponent	Exponent (30-48 Hz)	Sex (Male)	116 / 231	-0.613 (-0.892, -0.334)	0.14	-4.35	111.77	< .001	***
Parietal	Exponent	Exponent (30-48 Hz)	Group (SSD) × Condition (EO)	116 / 231	-0.084 (-0.277, 0.109)	0.1	-0.86	112.9	0.39
Parietal	Power	Theta (4-8 Hz)	Intercept	79 / 122	0.394 (0.181, 0.608)	0.11	3.68	75.15	< .001	***
Parietal	Power	Theta (4-8 Hz)	Group (SSD)	79 / 122	0.051 (-0.079, 0.182)	0.07	0.78	87.4	0.437
Parietal	Power	Theta (4-8 Hz)	Condition (EO)	79 / 122	-0.115 (-0.208, -0.023)	0.05	-2.51	45.82	0.016	*
Parietal	Power	Theta (4-8 Hz)	Age	79 / 122	0.005 (-0.001, 0.011)	0	1.77	76.17	0.08
Parietal	Power	Theta (4-8 Hz)	Sex (Male)	79 / 122	-0.082 (-0.208, 0.044)	0.06	-1.3	72.24	0.197
Parietal	Power	Theta (4-8 Hz)	Group (SSD) × Condition (EO)	79 / 122	-0.054 (-0.176, 0.067)	0.06	-0.9	45.13	0.374
Left Temporal	Center frequency	iAPF (8-12 Hz)	Intercept	115 / 221	10.891 (10.525, 11.256)	0.18	59.05	117.85	< .001	***
Left Temporal	Center frequency	iAPF (8-12 Hz)	Group (SSD)	115 / 221	-0.195 (-0.450, 0.060)	0.13	-1.51	162.67	0.133
Left Temporal	Center frequency	iAPF (8-12 Hz)	Condition (EO)	115 / 221	0.183 (0.014, 0.353)	0.09	2.15	101.61	0.034	*
Left Temporal	Center frequency	iAPF (8-12 Hz)	Age	115 / 221	-0.016 (-0.025, -0.007)	0	-3.41	109.41	< .001	***
Left Temporal	Center frequency	iAPF (8-12 Hz)	Sex (Male)	115 / 221	-0.295 (-0.518, -0.071)	0.11	-2.61	105.7	0.01	*
Left Temporal	Center frequency	iAPF (8-12 Hz)	Group (SSD) × Condition (EO)	115 / 221	0.059 (-0.187, 0.305)	0.12	0.47	102.14	0.636
Left Temporal	Exponent	Exponent (30-48 Hz)	Intercept	116 / 231	1.822 (1.407, 2.236)	0.21	8.7	118.65	< .001	***
Left Temporal	Exponent	Exponent (30-48 Hz)	Group (SSD)	116 / 231	-0.060 (-0.341, 0.220)	0.14	-0.42	148.1	0.672
Left Temporal	Exponent	Exponent (30-48 Hz)	Condition (EO)	116 / 231	-0.217 (-0.364, -0.070)	0.07	-2.93	112.5	0.004	**
Left Temporal	Exponent	Exponent (30-48 Hz)	Age	116 / 231	-0.007 (-0.017, 0.004)	0.01	-1.23	111.73	0.22
Left Temporal	Exponent	Exponent (30-48 Hz)	Sex (Male)	116 / 231	-0.360 (-0.616, -0.103)	0.13	-2.77	111.57	0.007	**
Left Temporal	Exponent	Exponent (30-48 Hz)	Group (SSD) × Condition (EO)	116 / 231	-0.034 (-0.246, 0.178)	0.11	-0.32	112.75	0.751
Left Temporal	Power	Theta (4-8 Hz)	Intercept	76 / 117	0.387 (0.207, 0.567)	0.09	4.28	80.74	< .001	***
Left Temporal	Power	Theta (4-8 Hz)	Group (SSD)	76 / 117	-0.009 (-0.138, 0.120)	0.07	-0.14	105.96	0.89
Left Temporal	Power	Theta (4-8 Hz)	Condition (EO)	76 / 117	-0.177 (-0.296, -0.058)	0.06	-2.97	69.12	0.004	**
Left Temporal	Power	Theta (4-8 Hz)	Age	76 / 117	0.003 (-0.002, 0.008)	0	1.28	67.25	0.205
Left Temporal	Power	Theta (4-8 Hz)	Sex (Male)	76 / 117	0.022 (-0.087, 0.130)	0.05	0.4	71.93	0.691
Left Temporal	Power	Theta (4-8 Hz)	Group (SSD) × Condition (EO)	76 / 117	0.079 (-0.078, 0.236)	0.08	1.01	60.7	0.316
Right Temporal	Center frequency	iAPF (8-12 Hz)	Intercept	116 / 220	10.864 (10.490, 11.238)	0.19	57.5	128.1	< .001	***
Right Temporal	Center frequency	iAPF (8-12 Hz)	Group (SSD)	116 / 220	-0.226 (-0.495, 0.043)	0.14	-1.66	185.64	0.099
Right Temporal	Center frequency	iAPF (8-12 Hz)	Condition (EO)	116 / 220	0.197 (-0.016, 0.411)	0.11	1.83	105.03	0.069
Right Temporal	Center frequency	iAPF (8-12 Hz)	Age	116 / 220	-0.014 (-0.023, -0.005)	0	-3.05	110.59	0.003	**
Right Temporal	Center frequency	iAPF (8-12 Hz)	Sex (Male)	116 / 220	-0.242 (-0.468, -0.017)	0.11	-2.13	108.72	0.035	*
Right Temporal	Center frequency	iAPF (8-12 Hz)	Group (SSD) × Condition (EO)	116 / 220	0.064 (-0.243, 0.372)	0.16	0.42	105.21	0.679
Right Temporal	Exponent	Exponent (30-48 Hz)	Intercept	116 / 231	2.038 (1.610, 2.466)	0.22	9.43	117.34	< .001	***
Right Temporal	Exponent	Exponent (30-48 Hz)	Group (SSD)	116 / 231	-0.001 (-0.287, 0.285)	0.14	0	140.79	0.996
Right Temporal	Exponent	Exponent (30-48 Hz)	Condition (EO)	116 / 231	-0.257 (-0.392, -0.122)	0.07	-3.77	112.72	< .001	***
Right Temporal	Exponent	Exponent (30-48 Hz)	Age	116 / 231	-0.010 (-0.021, 0.000)	0.01	-1.91	111.92	0.059
Right Temporal	Exponent	Exponent (30-48 Hz)	Sex (Male)	116 / 231	-0.353 (-0.619, -0.087)	0.13	-2.63	111.79	0.01	**
Right Temporal	Exponent	Exponent (30-48 Hz)	Group (SSD) × Condition (EO)	116 / 231	-0.013 (-0.208, 0.182)	0.1	-0.13	112.93	0.894
Right Temporal	Power	Theta (4-8 Hz)	Intercept	76 / 114	0.336 (0.148, 0.525)	0.09	3.55	73.57	< .001	***
Right Temporal	Power	Theta (4-8 Hz)	Group (SSD)	76 / 114	0.044 (-0.076, 0.164)	0.06	0.73	91.06	0.47
Right Temporal	Power	Theta (4-8 Hz)	Condition (EO)	76 / 114	-0.141 (-0.242, -0.040)	0.05	-2.8	53.21	0.007	**
Right Temporal	Power	Theta (4-8 Hz)	Age	76 / 114	0.004 (-0.001, 0.009)	0	1.62	67.63	0.11
Right Temporal	Power	Theta (4-8 Hz)	Sex (Male)	76 / 114	-0.034 (-0.144, 0.076)	0.06	-0.61	68.63	0.545
Right Temporal	Power	Theta (4-8 Hz)	Group (SSD) × Condition (EO)	76 / 114	0.033 (-0.094, 0.159)	0.06	0.52	47.13	0.604
Occipital	Center frequency	iAPF (8-12 Hz)	Intercept	115 / 225	10.963 (10.593, 11.333)	0.19	58.62	140.56	< .001	***
Occipital	Center frequency	iAPF (8-12 Hz)	Group (SSD)	115 / 225	-0.370 (-0.652, -0.088)	0.14	-2.58	210.51	0.01	*
Occipital	Center frequency	iAPF (8-12 Hz)	Condition (EO)	115 / 225	-0.066 (-0.317, 0.186)	0.13	-0.52	112.15	0.607
Occipital	Center frequency	iAPF (8-12 Hz)	Age	115 / 225	-0.012 (-0.021, -0.003)	0	-2.63	115.23	0.01	**
Occipital	Center frequency	iAPF (8-12 Hz)	Sex (Male)	115 / 225	-0.378 (-0.596, -0.161)	0.11	-3.44	110.92	< .001	***
Occipital	Center frequency	iAPF (8-12 Hz)	Group (SSD) × Condition (EO)	115 / 225	0.443 (0.080, 0.805)	0.18	2.42	111.75	0.017	*
Occipital	Exponent	Exponent (30-48 Hz)	Intercept	116 / 231	2.064 (1.606, 2.521)	0.23	8.93	118.98	< .001	***
Occipital	Exponent	Exponent (30-48 Hz)	Group (SSD)	116 / 231	-0.478 (-0.787, -0.169)	0.16	-3.05	148.44	0.003	**
Occipital	Exponent	Exponent (30-48 Hz)	Condition (EO)	116 / 231	-0.535 (-0.697, -0.373)	0.08	-6.53	112.82	< .001	***
Occipital	Exponent	Exponent (30-48 Hz)	Age	116 / 231	-0.007 (-0.019, 0.004)	0.01	-1.24	112.06	0.219
Occipital	Exponent	Exponent (30-48 Hz)	Sex (Male)	116 / 231	-0.414 (-0.697, -0.130)	0.14	-2.89	111.89	0.005	**
Occipital	Exponent	Exponent (30-48 Hz)	Group (SSD) × Condition (EO)	116 / 231	0.232 (-0.003, 0.466)	0.12	1.96	113.08	0.053
Occipital	Power	Theta (4-8 Hz)	Intercept	98 / 148	0.411 (0.249, 0.574)	0.08	5.04	97.66	< .001	***
Occipital	Power	Theta (4-8 Hz)	Group (SSD)	98 / 148	-0.069 (-0.179, 0.040)	0.06	-1.25	121.88	0.213
Occipital	Power	Theta (4-8 Hz)	Condition (EO)	98 / 148	-0.260 (-0.353, -0.167)	0.05	-5.57	61.34	< .001	***
Occipital	Power	Theta (4-8 Hz)	Age	98 / 148	0.004 (0.000, 0.008)	0	2.02	91	0.046	*
Occipital	Power	Theta (4-8 Hz)	Sex (Male)	98 / 148	-0.023 (-0.121, 0.075)	0.05	-0.47	85.03	0.637
Occipital	Power	Theta (4-8 Hz)	Group (SSD) × Condition (EO)	98 / 148	0.127 (0.007, 0.248)	0.06	2.11	57.56	0.039	*

## Sheet: Table S4. Regional - Group Dif.
Table S4. Post-Hoc Linear Model Comparisons of Regional Group Differences (HC vs. SSD) in EEG Parameters Following Significant Interaction Effects
Region	Condition	Outcome	Contrast	Group (Count)	Group (Mean)	Estimate (95% CI)	SE	t	df	p
Occipital	EC	Theta (4-8 Hz)	HC - SSD	HC (36) vs SSD (48)	HC (0.541) vs SSD (0.479)	0.069 (-0.040, 0.179)	0.06	1.25	125.78	0.214
Occipital	EO	Theta (4-8 Hz)	HC - SSD	HC (27) vs SSD (37)	HC (0.253) vs SSD (0.365)	-0.058 (-0.180, 0.064)	0.06	-0.94	139.09	0.348
Occipital	EC	iAPF (8-12 Hz)	HC - SSD	HC (60) vs SSD (54)	HC (10.371) vs SSD (9.921)	0.370 (0.088, 0.652)	0.14	2.58	210.41	0.01	*
Occipital	EO	iAPF (8-12 Hz)	HC - SSD	HC (57) vs SSD (54)	HC (10.32) vs SSD (10.296)	-0.072 (-0.360, 0.215)	0.15	-0.5	211.62	0.62

## Sheet: Table S5. Global - Clinical and
Table S5. Linear Mixed-Effects Model Results Examining Associations Between Baseline Clinical Variables (Cognition and Symptoms) and Baseline Global Confirmatory EEG Parameters, Including Covariates and FDR Correction
Clinical	Specparam	Outcome	Term	N (ID/Obs)	Estimate (95% CI)	SE	t	df	p (uncorr.)		p (FDR)
Cognition	Power	Theta (4-8 Hz)	Intercept	42 / 71	0.347 (0.086, 0.608)	0.13	2.69	38.03	0.01	*	0.01	*
Cognition	Power	Theta (4-8 Hz)	BACS composite z	42 / 71	-0.029 (-0.095, 0.037)	0.03	-0.89	50.56	0.379		0.379
Cognition	Power	Theta (4-8 Hz)	Condition (EO)	42 / 71	-0.115 (-0.178, -0.053)	0.03	-3.77	30.43	< .001	***	0.001	**
Cognition	Power	Theta (4-8 Hz)	Age	42 / 71	0.000 (-0.006, 0.006)	0	0.16	38.43	0.876		0.876
Cognition	Power	Theta (4-8 Hz)	Sex (Male)	42 / 71	0.089 (-0.037, 0.215)	0.06	1.43	36.11	0.162		0.162
Cognition	Power	Theta (4-8 Hz)	CPZ Equivalent	42 / 71	0.000 (0.000, 0.000)	0	3.35	37.46	0.002	**	0.005	**
Cognition	Power	Theta (4-8 Hz)	BACS composite z × Condition (EO)	42 / 71	0.007 (-0.050, 0.063)	0.03	0.25	29.98	0.807		0.817
Cognition	Center frequency	iAPF (8-12 Hz)	Intercept	54 / 103	10.630 (9.984, 11.276)	0.32	33.07	49.51	< .001	***	< .001	***
Cognition	Center frequency	iAPF (8-12 Hz)	BACS composite z	54 / 103	0.100 (-0.091, 0.291)	0.1	1.04	78.78	0.299		0.379
Cognition	Center frequency	iAPF (8-12 Hz)	Condition (EO)	54 / 103	0.256 (0.068, 0.443)	0.09	2.73	48.47	0.009	**	0.009	**
Cognition	Center frequency	iAPF (8-12 Hz)	Age	54 / 103	-0.009 (-0.023, 0.005)	0.01	-1.31	47.79	0.195		0.343
Cognition	Center frequency	iAPF (8-12 Hz)	Sex (Male)	54 / 103	-0.380 (-0.707, -0.053)	0.16	-2.33	48.93	0.024	*	0.036	*
Cognition	Center frequency	iAPF (8-12 Hz)	CPZ Equivalent	54 / 103	-0.000 (-0.001, 0.000)	0	-1.59	46.86	0.118		0.177
Cognition	Center frequency	iAPF (8-12 Hz)	BACS composite z × Condition (EO)	54 / 103	-0.022 (-0.216, 0.171)	0.1	-0.23	51.28	0.817		0.817
Cognition	Exponent	Exponent (30-48 Hz)	Intercept	54 / 107	2.117 (1.425, 2.809)	0.34	6.15	49.38	< .001	***	< .001	***
Cognition	Exponent	Exponent (30-48 Hz)	BACS composite z	54 / 107	0.220 (0.033, 0.406)	0.09	2.35	61.83	0.022	*	0.065
Cognition	Exponent	Exponent (30-48 Hz)	Condition (EO)	54 / 107	-0.272 (-0.384, -0.160)	0.06	-4.88	51.09	< .001	***	< .001	***
Cognition	Exponent	Exponent (30-48 Hz)	Age	54 / 107	-0.009 (-0.024, 0.006)	0.01	-1.22	48.85	0.229		0.343
Cognition	Exponent	Exponent (30-48 Hz)	Sex (Male)	54 / 107	-0.497 (-0.847, -0.147)	0.17	-2.85	48.87	0.006	**	0.019	*
Cognition	Exponent	Exponent (30-48 Hz)	CPZ Equivalent	54 / 107	0.000 (-0.000, 0.001)	0	1.19	48.89	0.242		0.242
Cognition	Exponent	Exponent (30-48 Hz)	BACS composite z × Condition (EO)	54 / 107	0.030 (-0.086, 0.146)	0.06	0.52	52.02	0.603		0.817
Symptoms	Power	Theta (4-8 Hz)	Intercept	42 / 71	0.309 (0.028, 0.589)	0.14	2.22	42.85	0.032	*	0.032	*
Symptoms	Power	Theta (4-8 Hz)	PANSS pos	42 / 71	0.003 (-0.017, 0.023)	0.01	0.33	46.27	0.741		0.854
Symptoms	Power	Theta (4-8 Hz)	Condition (EO)	42 / 71	-0.171 (-0.353, 0.012)	0.09	-1.91	29.52	0.066		0.098
Symptoms	Power	Theta (4-8 Hz)	Age	42 / 71	0.001 (-0.005, 0.007)	0	0.26	38.3	0.793		0.793
Symptoms	Power	Theta (4-8 Hz)	Sex (Male)	42 / 71	0.076 (-0.059, 0.212)	0.07	1.14	36.63	0.26		0.26
Symptoms	Power	Theta (4-8 Hz)	CPZ Equivalent	42 / 71	0.000 (0.000, 0.000)	0	3.13	36.9	0.003	**	0.01	*
Symptoms	Power	Theta (4-8 Hz)	PANSS pos × Condition (EO)	42 / 71	0.005 (-0.010, 0.020)	0.01	0.67	28.96	0.506		0.76
Symptoms	Center frequency	iAPF (8-12 Hz)	Intercept	54 / 103	10.423 (9.657, 11.189)	0.38	27.19	63.72	< .001	***	< .001	***
Symptoms	Center frequency	iAPF (8-12 Hz)	PANSS pos	54 / 103	0.030 (-0.026, 0.086)	0.03	1.08	70.69	0.285		0.854
Symptoms	Center frequency	iAPF (8-12 Hz)	Condition (EO)	54 / 103	0.665 (0.069, 1.262)	0.3	2.24	47.69	0.03	*	0.089
Symptoms	Center frequency	iAPF (8-12 Hz)	Age	54 / 103	-0.011 (-0.025, 0.003)	0.01	-1.63	48.1	0.11		0.165
Symptoms	Center frequency	iAPF (8-12 Hz)	Sex (Male)	54 / 103	-0.396 (-0.737, -0.056)	0.17	-2.34	48.54	0.023	*	0.035	*
Symptoms	Center frequency	iAPF (8-12 Hz)	CPZ Equivalent	54 / 103	-0.000 (-0.001, 0.000)	0	-1.78	46.49	0.082		0.123
Symptoms	Center frequency	iAPF (8-12 Hz)	PANSS pos × Condition (EO)	54 / 103	-0.038 (-0.089, 0.014)	0.03	-1.46	47.69	0.151		0.452
Symptoms	Exponent	Exponent (30-48 Hz)	Intercept	54 / 107	2.344 (1.511, 3.177)	0.42	5.64	53.88	< .001	***	< .001	***
Symptoms	Exponent	Exponent (30-48 Hz)	PANSS pos	54 / 107	-0.006 (-0.065, 0.054)	0.03	-0.19	56.44	0.854		0.854
Symptoms	Exponent	Exponent (30-48 Hz)	Condition (EO)	54 / 107	-0.220 (-0.586, 0.146)	0.18	-1.21	50.74	0.233		0.233
Symptoms	Exponent	Exponent (30-48 Hz)	Age	54 / 107	-0.013 (-0.029, 0.003)	0.01	-1.68	48.67	0.098		0.165
Symptoms	Exponent	Exponent (30-48 Hz)	Sex (Male)	54 / 107	-0.455 (-0.842, -0.069)	0.19	-2.37	48.69	0.022	*	0.035	*
Symptoms	Exponent	Exponent (30-48 Hz)	CPZ Equivalent	54 / 107	0.000 (-0.000, 0.001)	0	0.81	48.6	0.421		0.421
Symptoms	Exponent	Exponent (30-48 Hz)	PANSS pos × Condition (EO)	54 / 107	-0.005 (-0.037, 0.027)	0.02	-0.3	50.83	0.766		0.766
Symptoms	Power	Theta (4-8 Hz)	Intercept	42 / 71	0.293 (-0.025, 0.610)	0.16	1.86	40.88	0.07		0.07
Symptoms	Power	Theta (4-8 Hz)	PANSS neg	42 / 71	0.001 (-0.013, 0.015)	0.01	0.17	46.1	0.868		0.868
Symptoms	Power	Theta (4-8 Hz)	Condition (EO)	42 / 71	-0.022 (-0.188, 0.144)	0.08	-0.27	28.73	0.788		0.788
Symptoms	Power	Theta (4-8 Hz)	Age	42 / 71	0.001 (-0.005, 0.007)	0	0.41	38.02	0.681		0.681
Symptoms	Power	Theta (4-8 Hz)	Sex (Male)	42 / 71	0.090 (-0.039, 0.218)	0.06	1.41	36.01	0.166		0.166
Symptoms	Power	Theta (4-8 Hz)	CPZ Equivalent	42 / 71	0.000 (0.000, 0.000)	0	3.4	38.09	0.002	**	0.005	**
Symptoms	Power	Theta (4-8 Hz)	PANSS neg × Condition (EO)	42 / 71	-0.007 (-0.018, 0.004)	0.01	-1.22	28.63	0.231		0.545
Symptoms	Center frequency	iAPF (8-12 Hz)	Intercept	54 / 103	11.026 (10.226, 11.826)	0.4	27.57	60.46	< .001	***	< .001	***
Symptoms	Center frequency	iAPF (8-12 Hz)	PANSS neg	54 / 103	-0.025 (-0.064, 0.013)	0.02	-1.32	73.95	0.19		0.349
Symptoms	Center frequency	iAPF (8-12 Hz)	Condition (EO)	54 / 103	0.100 (-0.445, 0.644)	0.27	0.37	48.57	0.715		0.788
Symptoms	Center frequency	iAPF (8-12 Hz)	Age	54 / 103	-0.012 (-0.025, 0.002)	0.01	-1.7	48.56	0.096		0.143
Symptoms	Center frequency	iAPF (8-12 Hz)	Sex (Male)	54 / 103	-0.351 (-0.677, -0.025)	0.16	-2.16	48.6	0.035	*	0.053
Symptoms	Center frequency	iAPF (8-12 Hz)	CPZ Equivalent	54 / 103	-0.000 (-0.001, 0.000)	0	-1.27	46.52	0.212		0.299
Symptoms	Center frequency	iAPF (8-12 Hz)	PANSS neg × Condition (EO)	54 / 103	0.011 (-0.026, 0.049)	0.02	0.61	48.47	0.545		0.545
Symptoms	Exponent	Exponent (30-48 Hz)	Intercept	54 / 107	2.632 (1.750, 3.513)	0.44	5.99	52.53	< .001	***	< .001	***
Symptoms	Exponent	Exponent (30-48 Hz)	PANSS neg	54 / 107	-0.024 (-0.065, 0.016)	0.02	-1.21	57.34	0.233		0.349
Symptoms	Exponent	Exponent (30-48 Hz)	Condition (EO)	54 / 107	-0.407 (-0.728, -0.086)	0.16	-2.54	50.83	0.014	*	0.042	*
Symptoms	Exponent	Exponent (30-48 Hz)	Age	54 / 107	-0.015 (-0.030, 0.001)	0.01	-1.89	48.83	0.065		0.143
Symptoms	Exponent	Exponent (30-48 Hz)	Sex (Male)	54 / 107	-0.451 (-0.824, -0.078)	0.19	-2.43	48.71	0.019	*	0.053
Symptoms	Exponent	Exponent (30-48 Hz)	CPZ Equivalent	54 / 107	0.000 (-0.000, 0.001)	0	1.05	48.59	0.299		0.299
Symptoms	Exponent	Exponent (30-48 Hz)	PANSS neg × Condition (EO)	54 / 107	0.010 (-0.012, 0.032)	0.01	0.9	50.98	0.372		0.545
Symptoms	Power	Theta (4-8 Hz)	Intercept	42 / 71	0.263 (-0.102, 0.628)	0.18	1.45	44.33	0.154		0.154
Symptoms	Power	Theta (4-8 Hz)	PANSS gen	42 / 71	0.003 (-0.010, 0.016)	0.01	0.42	46.43	0.678		0.678
Symptoms	Power	Theta (4-8 Hz)	Condition (EO)	42 / 71	-0.107 (-0.380, 0.166)	0.13	-0.8	29.14	0.429		0.59
Symptoms	Power	Theta (4-8 Hz)	Age	42 / 71	0.001 (-0.005, 0.007)	0	0.36	38.24	0.719		0.719
Symptoms	Power	Theta (4-8 Hz)	Sex (Male)	42 / 71	0.084 (-0.045, 0.214)	0.06	1.32	36.38	0.195		0.195
Symptoms	Power	Theta (4-8 Hz)	CPZ Equivalent	42 / 71	0.000 (0.000, 0.000)	0	3.11	36.9	0.004	**	0.011	*
Symptoms	Power	Theta (4-8 Hz)	PANSS gen × Condition (EO)	42 / 71	-0.000 (-0.011, 0.011)	0.01	-0.05	29.29	0.962		0.999
Symptoms	Center frequency	iAPF (8-12 Hz)	Intercept	54 / 103	10.512 (9.489, 11.534)	0.51	20.51	69.37	< .001	***	< .001	***
Symptoms	Center frequency	iAPF (8-12 Hz)	PANSS gen	54 / 103	0.010 (-0.029, 0.048)	0.02	0.5	71.35	0.622		0.678
Symptoms	Center frequency	iAPF (8-12 Hz)	Condition (EO)	54 / 103	0.251 (-0.680, 1.183)	0.46	0.54	47.94	0.59		0.59
Symptoms	Center frequency	iAPF (8-12 Hz)	Age	54 / 103	-0.011 (-0.025, 0.003)	0.01	-1.63	48.36	0.109		0.163
Symptoms	Center frequency	iAPF (8-12 Hz)	Sex (Male)	54 / 103	-0.387 (-0.721, -0.053)	0.17	-2.33	48.52	0.024	*	0.036	*
Symptoms	Center frequency	iAPF (8-12 Hz)	CPZ Equivalent	54 / 103	-0.000 (-0.001, 0.000)	0	-1.81	46.71	0.076		0.114
Symptoms	Center frequency	iAPF (8-12 Hz)	PANSS gen × Condition (EO)	54 / 103	0.000 (-0.037, 0.037)	0.02	0	47.94	0.999		0.999
Symptoms	Exponent	Exponent (30-48 Hz)	Intercept	54 / 107	2.711 (1.625, 3.797)	0.54	5	55.63	< .001	***	< .001	***
Symptoms	Exponent	Exponent (30-48 Hz)	PANSS gen	54 / 107	-0.020 (-0.061, 0.021)	0.02	-0.98	56.36	0.333		0.678
Symptoms	Exponent	Exponent (30-48 Hz)	Condition (EO)	54 / 107	-0.295 (-0.851, 0.261)	0.28	-1.07	50.71	0.291		0.59
Symptoms	Exponent	Exponent (30-48 Hz)	Age	54 / 107	-0.013 (-0.028, 0.003)	0.01	-1.65	48.72	0.105		0.163
Symptoms	Exponent	Exponent (30-48 Hz)	Sex (Male)	54 / 107	-0.436 (-0.812, -0.059)	0.19	-2.33	48.66	0.024	*	0.036	*
Symptoms	Exponent	Exponent (30-48 Hz)	CPZ Equivalent	54 / 107	0.000 (-0.000, 0.001)	0	1.07	48.62	0.289		0.289
Symptoms	Exponent	Exponent (30-48 Hz)	PANSS gen × Condition (EO)	54 / 107	0.001 (-0.021, 0.023)	0.01	0.08	50.76	0.933		0.999

## Sheet: Table S6. Regional - Clinical a
Table S6. Linear Mixed-Effects Model Results Examining Associations Between Baseline Clinical Variables (Cognition and Symptoms) and Baseline Regional Exporatory EEG Parameters, Including Covariates and FDR Correction
Region	Clinical	Specparam	Outcome	Term	N (ID/Obs)	Estimate (95% CI)	SE	t	df	p (uncorr.)
Frontal	Cognition	Center frequency	iAPF (8-12 Hz)	Intercept	53 / 100	10.310 (9.463, 11.156)	0.42	24.46	50.16	< .001	***
Frontal	Cognition	Center frequency	iAPF (8-12 Hz)	BACS composite z	53 / 100	0.027 (-0.218, 0.273)	0.12	0.22	76.91	0.825
Frontal	Cognition	Center frequency	iAPF (8-12 Hz)	Condition (EO)	53 / 100	0.218 (-0.025, 0.461)	0.12	1.81	47.54	0.077
Frontal	Cognition	Center frequency	iAPF (8-12 Hz)	Age	53 / 100	-0.006 (-0.024, 0.012)	0.01	-0.67	48.09	0.503
Frontal	Cognition	Center frequency	iAPF (8-12 Hz)	Sex (Male)	53 / 100	-0.210 (-0.637, 0.217)	0.21	-0.99	49.07	0.328
Frontal	Cognition	Center frequency	iAPF (8-12 Hz)	CPZ Equivalent	53 / 100	-0.000 (-0.001, 0.000)	0	-1.02	46.64	0.311
Frontal	Cognition	Center frequency	iAPF (8-12 Hz)	BACS composite z × Condition (EO)	53 / 100	-0.010 (-0.258, 0.238)	0.12	-0.08	49.84	0.937
Frontal	Symptoms	Center frequency	iAPF (8-12 Hz)	Intercept	53 / 100	10.019 (9.041, 10.998)	0.49	20.46	62.2	< .001	***
Frontal	Symptoms	Center frequency	iAPF (8-12 Hz)	PANSS pos	53 / 100	0.030 (-0.041, 0.101)	0.04	0.83	68.72	0.407
Frontal	Symptoms	Center frequency	iAPF (8-12 Hz)	Condition (EO)	53 / 100	0.921 (0.162, 1.680)	0.38	2.44	47.43	0.019	*
Frontal	Symptoms	Center frequency	iAPF (8-12 Hz)	Age	53 / 100	-0.007 (-0.025, 0.012)	0.01	-0.73	48.13	0.467
Frontal	Symptoms	Center frequency	iAPF (8-12 Hz)	Sex (Male)	53 / 100	-0.223 (-0.664, 0.219)	0.22	-1.01	48.72	0.316
Frontal	Symptoms	Center frequency	iAPF (8-12 Hz)	CPZ Equivalent	53 / 100	-0.000 (-0.001, 0.000)	0	-1	46.59	0.325
Frontal	Symptoms	Center frequency	iAPF (8-12 Hz)	PANSS pos × Condition (EO)	53 / 100	-0.063 (-0.129, 0.002)	0.03	-1.96	47.11	0.056
Frontal	Symptoms	Center frequency	iAPF (8-12 Hz)	Intercept	53 / 100	10.658 (9.629, 11.688)	0.51	20.71	59.96	< .001	***
Frontal	Symptoms	Center frequency	iAPF (8-12 Hz)	PANSS neg	53 / 100	-0.026 (-0.075, 0.022)	0.02	-1.08	72.37	0.285
Frontal	Symptoms	Center frequency	iAPF (8-12 Hz)	Condition (EO)	53 / 100	-0.076 (-0.777, 0.626)	0.35	-0.22	48.16	0.829
Frontal	Symptoms	Center frequency	iAPF (8-12 Hz)	Age	53 / 100	-0.007 (-0.025, 0.011)	0.01	-0.79	49	0.432
Frontal	Symptoms	Center frequency	iAPF (8-12 Hz)	Sex (Male)	53 / 100	-0.183 (-0.608, 0.242)	0.21	-0.87	49.03	0.391
Frontal	Symptoms	Center frequency	iAPF (8-12 Hz)	CPZ Equivalent	53 / 100	-0.000 (-0.001, 0.000)	0	-0.78	46.96	0.442
Frontal	Symptoms	Center frequency	iAPF (8-12 Hz)	PANSS neg × Condition (EO)	53 / 100	0.022 (-0.026, 0.069)	0.02	0.91	47.67	0.369
Frontal	Symptoms	Center frequency	iAPF (8-12 Hz)	Intercept	53 / 100	10.063 (8.759, 11.366)	0.65	15.4	68.19	< .001	***
Frontal	Symptoms	Center frequency	iAPF (8-12 Hz)	PANSS gen	53 / 100	0.014 (-0.035, 0.062)	0.02	0.56	70.38	0.58
Frontal	Symptoms	Center frequency	iAPF (8-12 Hz)	Condition (EO)	53 / 100	0.154 (-1.050, 1.358)	0.6	0.26	47.91	0.798
Frontal	Symptoms	Center frequency	iAPF (8-12 Hz)	Age	53 / 100	-0.007 (-0.025, 0.011)	0.01	-0.81	48.64	0.42
Frontal	Symptoms	Center frequency	iAPF (8-12 Hz)	Sex (Male)	53 / 100	-0.231 (-0.661, 0.200)	0.21	-1.08	48.98	0.287
Frontal	Symptoms	Center frequency	iAPF (8-12 Hz)	CPZ Equivalent	53 / 100	-0.000 (-0.001, 0.000)	0	-1.24	47.1	0.223
Frontal	Symptoms	Center frequency	iAPF (8-12 Hz)	PANSS gen × Condition (EO)	53 / 100	0.003 (-0.045, 0.050)	0.02	0.11	47.7	0.916
Frontal	Cognition	Exponent	Exponent (30-48 Hz)	Intercept	54 / 107	2.091 (1.288, 2.895)	0.4	5.23	49.22	< .001	***
Frontal	Cognition	Exponent	Exponent (30-48 Hz)	BACS composite z	54 / 107	0.205 (-0.013, 0.423)	0.11	1.88	63.23	0.065
Frontal	Cognition	Exponent	Exponent (30-48 Hz)	Condition (EO)	54 / 107	-0.314 (-0.452, -0.175)	0.07	-4.55	50.87	< .001	***
Frontal	Cognition	Exponent	Exponent (30-48 Hz)	Age	54 / 107	-0.005 (-0.022, 0.013)	0.01	-0.56	48.61	0.579
Frontal	Cognition	Exponent	Exponent (30-48 Hz)	Sex (Male)	54 / 107	-0.501 (-0.907, -0.094)	0.2	-2.48	48.63	0.017	*
Frontal	Cognition	Exponent	Exponent (30-48 Hz)	CPZ Equivalent	54 / 107	0.000 (-0.000, 0.001)	0	0.6	48.65	0.554
Frontal	Cognition	Exponent	Exponent (30-48 Hz)	BACS composite z × Condition (EO)	54 / 107	0.084 (-0.059, 0.227)	0.07	1.17	51.92	0.246
Frontal	Symptoms	Exponent	Exponent (30-48 Hz)	Intercept	54 / 107	2.460 (1.501, 3.419)	0.48	5.14	54.53	< .001	***
Frontal	Symptoms	Exponent	Exponent (30-48 Hz)	PANSS pos	54 / 107	-0.024 (-0.092, 0.045)	0.03	-0.69	57.57	0.494
Frontal	Symptoms	Exponent	Exponent (30-48 Hz)	Condition (EO)	54 / 107	-0.308 (-0.765, 0.149)	0.23	-1.35	50.44	0.182
Frontal	Symptoms	Exponent	Exponent (30-48 Hz)	Age	54 / 107	-0.009 (-0.027, 0.010)	0.01	-0.94	48.36	0.351
Frontal	Symptoms	Exponent	Exponent (30-48 Hz)	Sex (Male)	54 / 107	-0.428 (-0.872, 0.015)	0.22	-1.94	48.39	0.058
Frontal	Symptoms	Exponent	Exponent (30-48 Hz)	CPZ Equivalent	54 / 107	0.000 (-0.000, 0.001)	0	0.44	48.29	0.662
Frontal	Symptoms	Exponent	Exponent (30-48 Hz)	PANSS pos × Condition (EO)	54 / 107	-0.000 (-0.040, 0.040)	0.02	-0.02	50.55	0.983
Frontal	Symptoms	Exponent	Exponent (30-48 Hz)	Intercept	54 / 107	2.726 (1.714, 3.737)	0.5	5.4	52.99	< .001	***
Frontal	Symptoms	Exponent	Exponent (30-48 Hz)	PANSS neg	54 / 107	-0.033 (-0.080, 0.014)	0.02	-1.41	58.73	0.163
Frontal	Symptoms	Exponent	Exponent (30-48 Hz)	Condition (EO)	54 / 107	-0.432 (-0.834, -0.030)	0.2	-2.16	50.57	0.036	*
Frontal	Symptoms	Exponent	Exponent (30-48 Hz)	Age	54 / 107	-0.011 (-0.029, 0.007)	0.01	-1.25	48.56	0.219
Frontal	Symptoms	Exponent	Exponent (30-48 Hz)	Sex (Male)	54 / 107	-0.443 (-0.870, -0.017)	0.21	-2.09	48.42	0.042	*
Frontal	Symptoms	Exponent	Exponent (30-48 Hz)	CPZ Equivalent	54 / 107	0.000 (-0.000, 0.001)	0	0.65	48.29	0.522
Frontal	Symptoms	Exponent	Exponent (30-48 Hz)	PANSS neg × Condition (EO)	54 / 107	0.009 (-0.019, 0.037)	0.01	0.64	50.74	0.527
Frontal	Symptoms	Exponent	Exponent (30-48 Hz)	Intercept	54 / 107	2.785 (1.536, 4.035)	0.62	4.46	56.61	< .001	***
Frontal	Symptoms	Exponent	Exponent (30-48 Hz)	PANSS gen	54 / 107	-0.025 (-0.072, 0.022)	0.02	-1.07	57.48	0.29
Frontal	Symptoms	Exponent	Exponent (30-48 Hz)	Condition (EO)	54 / 107	-0.195 (-0.889, 0.499)	0.35	-0.56	50.4	0.575
Frontal	Symptoms	Exponent	Exponent (30-48 Hz)	Age	54 / 107	-0.008 (-0.026, 0.009)	0.01	-0.95	48.4	0.345
Frontal	Symptoms	Exponent	Exponent (30-48 Hz)	Sex (Male)	54 / 107	-0.423 (-0.854, 0.008)	0.21	-1.97	48.33	0.054
Frontal	Symptoms	Exponent	Exponent (30-48 Hz)	CPZ Equivalent	54 / 107	0.000 (-0.000, 0.001)	0	0.66	48.29	0.515
Frontal	Symptoms	Exponent	Exponent (30-48 Hz)	PANSS gen × Condition (EO)	54 / 107	-0.005 (-0.032, 0.023)	0.01	-0.35	50.45	0.729
Frontal	Cognition	Power	Theta (4-8 Hz)	Intercept	46 / 78	0.499 (0.266, 0.732)	0.12	4.33	39.86	< .001	***
Frontal	Cognition	Power	Theta (4-8 Hz)	BACS composite z	46 / 78	-0.020 (-0.084, 0.045)	0.03	-0.61	61.78	0.545
Frontal	Cognition	Power	Theta (4-8 Hz)	Condition (EO)	46 / 78	-0.091 (-0.165, -0.018)	0.04	-2.51	35.91	0.017	*
Frontal	Cognition	Power	Theta (4-8 Hz)	Age	46 / 78	-0.003 (-0.008, 0.002)	0	-1.32	38.25	0.195
Frontal	Cognition	Power	Theta (4-8 Hz)	Sex (Male)	46 / 78	0.127 (0.013, 0.242)	0.06	2.25	38.98	0.03	*
Frontal	Cognition	Power	Theta (4-8 Hz)	CPZ Equivalent	46 / 78	0.000 (0.000, 0.000)	0	3.25	38.23	0.002	**
Frontal	Cognition	Power	Theta (4-8 Hz)	BACS composite z × Condition (EO)	46 / 78	-0.032 (-0.108, 0.044)	0.04	-0.86	40.4	0.393
Frontal	Symptoms	Power	Theta (4-8 Hz)	Intercept	46 / 78	0.509 (0.233, 0.785)	0.14	3.7	50.16	< .001	***
Frontal	Symptoms	Power	Theta (4-8 Hz)	PANSS pos	46 / 78	-0.005 (-0.024, 0.015)	0.01	-0.47	58.03	0.642
Frontal	Symptoms	Power	Theta (4-8 Hz)	Condition (EO)	46 / 78	-0.202 (-0.429, 0.026)	0.11	-1.8	36.54	0.081
Frontal	Symptoms	Power	Theta (4-8 Hz)	Age	46 / 78	-0.002 (-0.007, 0.003)	0	-0.93	39.64	0.36
Frontal	Symptoms	Power	Theta (4-8 Hz)	Sex (Male)	46 / 78	0.128 (0.005, 0.251)	0.06	2.1	41.07	0.042	*
Frontal	Symptoms	Power	Theta (4-8 Hz)	CPZ Equivalent	46 / 78	0.000 (0.000, 0.000)	0	3.16	40.26	0.003	**
Frontal	Symptoms	Power	Theta (4-8 Hz)	PANSS pos × Condition (EO)	46 / 78	0.009 (-0.010, 0.028)	0.01	0.97	34.46	0.338
Frontal	Symptoms	Power	Theta (4-8 Hz)	Intercept	46 / 78	0.420 (0.127, 0.714)	0.15	2.88	47.54	0.006	**
Frontal	Symptoms	Power	Theta (4-8 Hz)	PANSS neg	46 / 78	0.003 (-0.010, 0.016)	0.01	0.47	57.72	0.637
Frontal	Symptoms	Power	Theta (4-8 Hz)	Condition (EO)	46 / 78	-0.077 (-0.278, 0.124)	0.1	-0.78	33.71	0.439
Frontal	Symptoms	Power	Theta (4-8 Hz)	Age	46 / 78	-0.002 (-0.007, 0.003)	0	-0.91	38.79	0.369
Frontal	Symptoms	Power	Theta (4-8 Hz)	Sex (Male)	46 / 78	0.123 (0.004, 0.243)	0.06	2.1	39.42	0.043	*
Frontal	Symptoms	Power	Theta (4-8 Hz)	CPZ Equivalent	46 / 78	0.000 (0.000, 0.000)	0	3.05	38.05	0.004	**
Frontal	Symptoms	Power	Theta (4-8 Hz)	PANSS neg × Condition (EO)	46 / 78	-0.001 (-0.015, 0.012)	0.01	-0.21	34.46	0.832
Frontal	Symptoms	Power	Theta (4-8 Hz)	Intercept	46 / 78	0.424 (0.061, 0.786)	0.18	2.34	55.49	0.023	*
Frontal	Symptoms	Power	Theta (4-8 Hz)	PANSS gen	46 / 78	0.002 (-0.011, 0.015)	0.01	0.3	58.83	0.765
Frontal	Symptoms	Power	Theta (4-8 Hz)	Condition (EO)	46 / 78	-0.116 (-0.459, 0.227)	0.17	-0.69	35.89	0.496
Frontal	Symptoms	Power	Theta (4-8 Hz)	Age	46 / 78	-0.002 (-0.007, 0.003)	0	-0.99	39.57	0.327
Frontal	Symptoms	Power	Theta (4-8 Hz)	Sex (Male)	46 / 78	0.123 (0.003, 0.242)	0.06	2.07	40.39	0.045	*
Frontal	Symptoms	Power	Theta (4-8 Hz)	CPZ Equivalent	46 / 78	0.000 (0.000, 0.000)	0	2.97	40.53	0.005	**
Frontal	Symptoms	Power	Theta (4-8 Hz)	PANSS gen × Condition (EO)	46 / 78	0.001 (-0.013, 0.014)	0.01	0.11	34.74	0.912
Central	Cognition	Center frequency	iAPF (8-12 Hz)	Intercept	53 / 101	10.647 (9.935, 11.358)	0.35	30.07	48.54	< .001	***
Central	Cognition	Center frequency	iAPF (8-12 Hz)	BACS composite z	53 / 101	0.082 (-0.129, 0.292)	0.11	0.77	78.91	0.442
Central	Cognition	Center frequency	iAPF (8-12 Hz)	Condition (EO)	53 / 101	0.257 (0.044, 0.470)	0.11	2.42	48.09	0.019	*
Central	Cognition	Center frequency	iAPF (8-12 Hz)	Age	53 / 101	-0.010 (-0.026, 0.005)	0.01	-1.36	46.82	0.179
Central	Cognition	Center frequency	iAPF (8-12 Hz)	Sex (Male)	53 / 101	-0.386 (-0.747, -0.026)	0.18	-2.16	47.82	0.036	*
Central	Cognition	Center frequency	iAPF (8-12 Hz)	CPZ Equivalent	53 / 101	-0.000 (-0.001, 0.000)	0	-1.83	46.18	0.074
Central	Cognition	Center frequency	iAPF (8-12 Hz)	BACS composite z × Condition (EO)	53 / 101	-0.024 (-0.244, 0.196)	0.11	-0.22	51.02	0.829
Central	Symptoms	Center frequency	iAPF (8-12 Hz)	Intercept	53 / 101	10.495 (9.657, 11.334)	0.42	25.02	63.95	< .001	***
Central	Symptoms	Center frequency	iAPF (8-12 Hz)	PANSS pos	53 / 101	0.025 (-0.036, 0.086)	0.03	0.82	71.78	0.417
Central	Symptoms	Center frequency	iAPF (8-12 Hz)	Condition (EO)	53 / 101	0.455 (-0.228, 1.138)	0.34	1.34	47.49	0.187
Central	Symptoms	Center frequency	iAPF (8-12 Hz)	Age	53 / 101	-0.012 (-0.028, 0.003)	0.01	-1.63	46.9	0.11
Central	Symptoms	Center frequency	iAPF (8-12 Hz)	Sex (Male)	53 / 101	-0.409 (-0.782, -0.035)	0.19	-2.2	47.63	0.033	*
Central	Symptoms	Center frequency	iAPF (8-12 Hz)	CPZ Equivalent	53 / 101	-0.001 (-0.001, -0.000)	0	-2.02	46	0.049	*
Central	Symptoms	Center frequency	iAPF (8-12 Hz)	PANSS pos × Condition (EO)	53 / 101	-0.018 (-0.078, 0.041)	0.03	-0.62	47.41	0.536
Central	Symptoms	Center frequency	iAPF (8-12 Hz)	Intercept	53 / 101	10.983 (10.106, 11.860)	0.44	25.06	59.82	< .001	***
Central	Symptoms	Center frequency	iAPF (8-12 Hz)	PANSS neg	53 / 101	-0.023 (-0.065, 0.019)	0.02	-1.07	74.16	0.288
Central	Symptoms	Center frequency	iAPF (8-12 Hz)	Condition (EO)	53 / 101	-0.000 (-0.612, 0.612)	0.3	0	48.5	1
Central	Symptoms	Center frequency	iAPF (8-12 Hz)	Age	53 / 101	-0.012 (-0.027, 0.003)	0.01	-1.61	47.65	0.114
Central	Symptoms	Center frequency	iAPF (8-12 Hz)	Sex (Male)	53 / 101	-0.358 (-0.718, 0.002)	0.18	-2	47.9	0.051
Central	Symptoms	Center frequency	iAPF (8-12 Hz)	CPZ Equivalent	53 / 101	-0.000 (-0.001, 0.000)	0	-1.61	46.17	0.115
Central	Symptoms	Center frequency	iAPF (8-12 Hz)	PANSS neg × Condition (EO)	53 / 101	0.019 (-0.023, 0.061)	0.02	0.9	48.11	0.372
Central	Symptoms	Center frequency	iAPF (8-12 Hz)	Intercept	53 / 101	10.513 (9.393, 11.633)	0.56	18.73	69.4	< .001	***
Central	Symptoms	Center frequency	iAPF (8-12 Hz)	PANSS gen	53 / 101	0.009 (-0.033, 0.051)	0.02	0.44	71.95	0.658
Central	Symptoms	Center frequency	iAPF (8-12 Hz)	Condition (EO)	53 / 101	0.232 (-0.823, 1.286)	0.52	0.44	48.03	0.661
Central	Symptoms	Center frequency	iAPF (8-12 Hz)	Age	53 / 101	-0.012 (-0.027, 0.003)	0.01	-1.6	47.39	0.117
Central	Symptoms	Center frequency	iAPF (8-12 Hz)	Sex (Male)	53 / 101	-0.393 (-0.758, -0.027)	0.18	-2.16	47.65	0.036	*
Central	Symptoms	Center frequency	iAPF (8-12 Hz)	CPZ Equivalent	53 / 101	-0.001 (-0.001, 0.000)	0	-1.99	46.5	0.052
Central	Symptoms	Center frequency	iAPF (8-12 Hz)	PANSS gen × Condition (EO)	53 / 101	0.001 (-0.041, 0.043)	0.02	0.04	48.24	0.964
Central	Cognition	Exponent	Exponent (30-48 Hz)	Intercept	54 / 107	2.877 (1.937, 3.817)	0.47	6.15	49.54	< .001	***
Central	Cognition	Exponent	Exponent (30-48 Hz)	BACS composite z	54 / 107	0.258 (0.005, 0.511)	0.13	2.04	61.49	0.046	*
Central	Cognition	Exponent	Exponent (30-48 Hz)	Condition (EO)	54 / 107	-0.279 (-0.427, -0.130)	0.07	-3.77	51.27	< .001	***
Central	Cognition	Exponent	Exponent (30-48 Hz)	Age	54 / 107	-0.014 (-0.034, 0.007)	0.01	-1.36	49.04	0.18
Central	Cognition	Exponent	Exponent (30-48 Hz)	Sex (Male)	54 / 107	-0.642 (-1.117, -0.166)	0.24	-2.71	49.06	0.009	**
Central	Cognition	Exponent	Exponent (30-48 Hz)	CPZ Equivalent	54 / 107	0.000 (-0.000, 0.001)	0	1.11	49.07	0.273
Central	Cognition	Exponent	Exponent (30-48 Hz)	BACS composite z × Condition (EO)	54 / 107	0.056 (-0.097, 0.210)	0.08	0.74	52.16	0.465
Central	Symptoms	Exponent	Exponent (30-48 Hz)	Intercept	54 / 107	3.054 (1.937, 4.171)	0.56	5.48	54.02	< .001	***
Central	Symptoms	Exponent	Exponent (30-48 Hz)	PANSS pos	54 / 107	0.006 (-0.074, 0.085)	0.04	0.14	56.53	0.887
Central	Symptoms	Exponent	Exponent (30-48 Hz)	Condition (EO)	54 / 107	-0.124 (-0.609, 0.362)	0.24	-0.51	51	0.612
Central	Symptoms	Exponent	Exponent (30-48 Hz)	Age	54 / 107	-0.020 (-0.041, 0.002)	0.01	-1.83	48.94	0.074
Central	Symptoms	Exponent	Exponent (30-48 Hz)	Sex (Male)	54 / 107	-0.605 (-1.124, -0.086)	0.26	-2.34	48.96	0.023	*
Central	Symptoms	Exponent	Exponent (30-48 Hz)	CPZ Equivalent	54 / 107	0.000 (-0.000, 0.001)	0	0.71	48.87	0.479
Central	Symptoms	Exponent	Exponent (30-48 Hz)	PANSS pos × Condition (EO)	54 / 107	-0.014 (-0.057, 0.028)	0.02	-0.67	51.1	0.503
Central	Symptoms	Exponent	Exponent (30-48 Hz)	Intercept	54 / 107	3.526 (2.347, 4.705)	0.59	6	52.82	< .001	***
Central	Symptoms	Exponent	Exponent (30-48 Hz)	PANSS neg	54 / 107	-0.032 (-0.086, 0.022)	0.03	-1.17	57.66	0.245
Central	Symptoms	Exponent	Exponent (30-48 Hz)	Condition (EO)	54 / 107	-0.364 (-0.794, 0.067)	0.21	-1.7	51.11	0.096
Central	Symptoms	Exponent	Exponent (30-48 Hz)	Age	54 / 107	-0.021 (-0.042, 0.000)	0.01	-2	49.11	0.051
Central	Symptoms	Exponent	Exponent (30-48 Hz)	Sex (Male)	54 / 107	-0.581 (-1.080, -0.082)	0.25	-2.34	48.99	0.023	*
Central	Symptoms	Exponent	Exponent (30-48 Hz)	CPZ Equivalent	54 / 107	0.000 (-0.000, 0.001)	0	1.06	48.87	0.293
Central	Symptoms	Exponent	Exponent (30-48 Hz)	PANSS neg × Condition (EO)	54 / 107	0.006 (-0.024, 0.036)	0.01	0.42	51.26	0.673
Central	Symptoms	Exponent	Exponent (30-48 Hz)	Intercept	54 / 107	3.445 (1.983, 4.907)	0.73	4.72	55.73	< .001	***
Central	Symptoms	Exponent	Exponent (30-48 Hz)	PANSS gen	54 / 107	-0.017 (-0.072, 0.038)	0.03	-0.62	56.44	0.535
Central	Symptoms	Exponent	Exponent (30-48 Hz)	Condition (EO)	54 / 107	-0.146 (-0.886, 0.593)	0.37	-0.4	50.98	0.693
Central	Symptoms	Exponent	Exponent (30-48 Hz)	Age	54 / 107	-0.019 (-0.040, 0.002)	0.01	-1.77	48.99	0.083
Central	Symptoms	Exponent	Exponent (30-48 Hz)	Sex (Male)	54 / 107	-0.573 (-1.081, -0.066)	0.25	-2.27	48.93	0.028	*
Central	Symptoms	Exponent	Exponent (30-48 Hz)	CPZ Equivalent	54 / 107	0.000 (-0.000, 0.001)	0	0.96	48.9	0.344
Central	Symptoms	Exponent	Exponent (30-48 Hz)	PANSS gen × Condition (EO)	54 / 107	-0.005 (-0.035, 0.024)	0.01	-0.37	51.03	0.715
Central	Cognition	Power	Theta (4-8 Hz)	Intercept	47 / 82	0.462 (0.228, 0.696)	0.12	3.98	43.91	< .001	***
Central	Cognition	Power	Theta (4-8 Hz)	BACS composite z	47 / 82	-0.035 (-0.099, 0.028)	0.03	-1.11	56.86	0.273
Central	Cognition	Power	Theta (4-8 Hz)	Condition (EO)	47 / 82	-0.134 (-0.184, -0.084)	0.02	-5.46	36.45	< .001	***
Central	Cognition	Power	Theta (4-8 Hz)	Age	47 / 82	-0.001 (-0.006, 0.004)	0	-0.41	43.41	0.682
Central	Cognition	Power	Theta (4-8 Hz)	Sex (Male)	47 / 82	0.035 (-0.084, 0.154)	0.06	0.59	42.26	0.555
Central	Cognition	Power	Theta (4-8 Hz)	CPZ Equivalent	47 / 82	0.000 (0.000, 0.000)	0	3.58	43.64	< .001	***
Central	Cognition	Power	Theta (4-8 Hz)	BACS composite z × Condition (EO)	47 / 82	0.009 (-0.039, 0.057)	0.02	0.38	35.84	0.704
Central	Symptoms	Power	Theta (4-8 Hz)	Intercept	47 / 82	0.435 (0.165, 0.704)	0.13	3.24	47.89	0.002	**
Central	Symptoms	Power	Theta (4-8 Hz)	PANSS pos	47 / 82	0.001 (-0.018, 0.020)	0.01	0.12	52.23	0.909
Central	Symptoms	Power	Theta (4-8 Hz)	Condition (EO)	47 / 82	-0.190 (-0.344, -0.037)	0.08	-2.52	35.55	0.016	*
Central	Symptoms	Power	Theta (4-8 Hz)	Age	47 / 82	-0.001 (-0.006, 0.005)	0	-0.26	43.18	0.799
Central	Symptoms	Power	Theta (4-8 Hz)	Sex (Male)	47 / 82	0.030 (-0.094, 0.153)	0.06	0.48	42.83	0.632
Central	Symptoms	Power	Theta (4-8 Hz)	CPZ Equivalent	47 / 82	0.000 (0.000, 0.000)	0	3.5	43.3	0.001	**
Central	Symptoms	Power	Theta (4-8 Hz)	PANSS pos × Condition (EO)	47 / 82	0.005 (-0.008, 0.018)	0.01	0.81	35.22	0.426
Central	Symptoms	Power	Theta (4-8 Hz)	Intercept	47 / 82	0.457 (0.179, 0.734)	0.14	3.31	46.77	0.002	**
Central	Symptoms	Power	Theta (4-8 Hz)	PANSS neg	47 / 82	-0.002 (-0.015, 0.011)	0.01	-0.33	52.42	0.741
Central	Symptoms	Power	Theta (4-8 Hz)	Condition (EO)	47 / 82	-0.093 (-0.227, 0.042)	0.07	-1.4	34.98	0.171
Central	Symptoms	Power	Theta (4-8 Hz)	Age	47 / 82	-0.001 (-0.006, 0.005)	0	-0.23	43.09	0.819
Central	Symptoms	Power	Theta (4-8 Hz)	Sex (Male)	47 / 82	0.039 (-0.082, 0.160)	0.06	0.65	42.12	0.521
Central	Symptoms	Power	Theta (4-8 Hz)	CPZ Equivalent	47 / 82	0.000 (0.000, 0.000)	0	3.75	44.39	< .001	***
Central	Symptoms	Power	Theta (4-8 Hz)	PANSS neg × Condition (EO)	47 / 82	-0.003 (-0.012, 0.006)	0	-0.64	35.01	0.525
Central	Symptoms	Power	Theta (4-8 Hz)	Intercept	47 / 82	0.502 (0.163, 0.840)	0.17	2.98	49.06	0.004	**
Central	Symptoms	Power	Theta (4-8 Hz)	PANSS gen	47 / 82	-0.003 (-0.016, 0.010)	0.01	-0.49	50.4	0.628
Central	Symptoms	Power	Theta (4-8 Hz)	Condition (EO)	47 / 82	-0.227 (-0.457, 0.003)	0.11	-2	35.42	0.053
Central	Symptoms	Power	Theta (4-8 Hz)	Age	47 / 82	-0.000 (-0.006, 0.005)	0	-0.16	43.04	0.875
Central	Symptoms	Power	Theta (4-8 Hz)	Sex (Male)	47 / 82	0.037 (-0.086, 0.160)	0.06	0.61	42.7	0.544
Central	Symptoms	Power	Theta (4-8 Hz)	CPZ Equivalent	47 / 82	0.000 (0.000, 0.000)	0	3.6	43.28	< .001	***
Central	Symptoms	Power	Theta (4-8 Hz)	PANSS gen × Condition (EO)	47 / 82	0.004 (-0.005, 0.013)	0	0.85	35.53	0.399
Parietal	Cognition	Center frequency	iAPF (8-12 Hz)	Intercept	54 / 104	10.735 (10.040, 11.430)	0.35	30.98	51.61	< .001	***
Parietal	Cognition	Center frequency	iAPF (8-12 Hz)	BACS composite z	54 / 104	0.189 (-0.031, 0.409)	0.11	1.71	89.21	0.091
Parietal	Cognition	Center frequency	iAPF (8-12 Hz)	Condition (EO)	54 / 104	0.235 (-0.019, 0.488)	0.13	1.86	50.5	0.069
Parietal	Cognition	Center frequency	iAPF (8-12 Hz)	Age	54 / 104	-0.009 (-0.024, 0.006)	0.01	-1.19	48.83	0.239
Parietal	Cognition	Center frequency	iAPF (8-12 Hz)	Sex (Male)	54 / 104	-0.233 (-0.583, 0.118)	0.17	-1.33	49.58	0.189
Parietal	Cognition	Center frequency	iAPF (8-12 Hz)	CPZ Equivalent	54 / 104	-0.000 (-0.001, 0.000)	0	-1.73	47.61	0.09
Parietal	Cognition	Center frequency	iAPF (8-12 Hz)	BACS composite z × Condition (EO)	54 / 104	-0.015 (-0.276, 0.246)	0.13	-0.11	54.38	0.91
Parietal	Symptoms	Center frequency	iAPF (8-12 Hz)	Intercept	54 / 104	10.547 (9.684, 11.409)	0.43	24.36	73.95	< .001	***
Parietal	Symptoms	Center frequency	iAPF (8-12 Hz)	PANSS pos	54 / 104	0.045 (-0.019, 0.109)	0.03	1.4	83.44	0.164
Parietal	Symptoms	Center frequency	iAPF (8-12 Hz)	Condition (EO)	54 / 104	0.346 (-0.479, 1.171)	0.41	0.84	48.64	0.403
Parietal	Symptoms	Center frequency	iAPF (8-12 Hz)	Age	54 / 104	-0.014 (-0.029, 0.001)	0.01	-1.89	48.58	0.065
Parietal	Symptoms	Center frequency	iAPF (8-12 Hz)	Sex (Male)	54 / 104	-0.280 (-0.646, 0.086)	0.18	-1.54	48.82	0.131
Parietal	Symptoms	Center frequency	iAPF (8-12 Hz)	CPZ Equivalent	54 / 104	-0.001 (-0.001, -0.000)	0	-2.32	46.54	0.025	*
Parietal	Symptoms	Center frequency	iAPF (8-12 Hz)	PANSS pos × Condition (EO)	54 / 104	-0.011 (-0.083, 0.061)	0.04	-0.31	48.91	0.755
Parietal	Symptoms	Center frequency	iAPF (8-12 Hz)	Intercept	54 / 104	11.273 (10.366, 12.181)	0.45	24.8	66.91	< .001	***
Parietal	Symptoms	Center frequency	iAPF (8-12 Hz)	PANSS neg	54 / 104	-0.031 (-0.076, 0.014)	0.02	-1.39	84.36	0.17
Parietal	Symptoms	Center frequency	iAPF (8-12 Hz)	Condition (EO)	54 / 104	-0.029 (-0.757, 0.699)	0.36	-0.08	49.41	0.937
Parietal	Symptoms	Center frequency	iAPF (8-12 Hz)	Age	54 / 104	-0.013 (-0.028, 0.002)	0.01	-1.73	49.26	0.09
Parietal	Symptoms	Center frequency	iAPF (8-12 Hz)	Sex (Male)	54 / 104	-0.188 (-0.547, 0.171)	0.18	-1.05	48.8	0.298
Parietal	Symptoms	Center frequency	iAPF (8-12 Hz)	CPZ Equivalent	54 / 104	-0.000 (-0.001, 0.000)	0	-1.47	46.78	0.148
Parietal	Symptoms	Center frequency	iAPF (8-12 Hz)	PANSS neg × Condition (EO)	54 / 104	0.019 (-0.031, 0.069)	0.02	0.75	49.59	0.454
Parietal	Symptoms	Center frequency	iAPF (8-12 Hz)	Intercept	54 / 104	10.626 (9.449, 11.803)	0.59	17.96	79.83	< .001	***
Parietal	Symptoms	Center frequency	iAPF (8-12 Hz)	PANSS gen	54 / 104	0.013 (-0.032, 0.058)	0.02	0.59	82.39	0.56
Parietal	Symptoms	Center frequency	iAPF (8-12 Hz)	Condition (EO)	54 / 104	0.108 (-1.135, 1.352)	0.62	0.17	48.22	0.862
Parietal	Symptoms	Center frequency	iAPF (8-12 Hz)	Age	54 / 104	-0.013 (-0.028, 0.002)	0.01	-1.7	48.99	0.096
Parietal	Symptoms	Center frequency	iAPF (8-12 Hz)	Sex (Male)	54 / 104	-0.238 (-0.604, 0.128)	0.18	-1.31	48.92	0.197
Parietal	Symptoms	Center frequency	iAPF (8-12 Hz)	CPZ Equivalent	54 / 104	-0.001 (-0.001, -0.000)	0	-2.11	46.94	0.04	*
Parietal	Symptoms	Center frequency	iAPF (8-12 Hz)	PANSS gen × Condition (EO)	54 / 104	0.005 (-0.045, 0.054)	0.02	0.19	48.46	0.847
Parietal	Cognition	Exponent	Exponent (30-48 Hz)	Intercept	54 / 107	2.767 (1.992, 3.543)	0.39	7.17	49.65	< .001	***
Parietal	Cognition	Exponent	Exponent (30-48 Hz)	BACS composite z	54 / 107	0.222 (0.008, 0.435)	0.11	2.07	66.31	0.042	*
Parietal	Cognition	Exponent	Exponent (30-48 Hz)	Condition (EO)	54 / 107	-0.439 (-0.586, -0.291)	0.07	-5.96	51.22	< .001	***
Parietal	Cognition	Exponent	Exponent (30-48 Hz)	Age	54 / 107	-0.010 (-0.027, 0.007)	0.01	-1.2	48.9	0.234
Parietal	Cognition	Exponent	Exponent (30-48 Hz)	Sex (Male)	54 / 107	-0.735 (-1.128, -0.343)	0.2	-3.77	48.93	< .001	***
Parietal	Cognition	Exponent	Exponent (30-48 Hz)	CPZ Equivalent	54 / 107	0.000 (-0.000, 0.001)	0	1.02	48.95	0.311
Parietal	Cognition	Exponent	Exponent (30-48 Hz)	BACS composite z × Condition (EO)	54 / 107	0.052 (-0.101, 0.204)	0.08	0.68	52.44	0.498
Parietal	Symptoms	Exponent	Exponent (30-48 Hz)	Intercept	54 / 107	3.072 (2.141, 4.004)	0.47	6.61	56.09	< .001	***
Parietal	Symptoms	Exponent	Exponent (30-48 Hz)	PANSS pos	54 / 107	-0.017 (-0.084, 0.050)	0.03	-0.51	59.7	0.612
Parietal	Symptoms	Exponent	Exponent (30-48 Hz)	Condition (EO)	54 / 107	-0.346 (-0.829, 0.138)	0.24	-1.43	50.82	0.158
Parietal	Symptoms	Exponent	Exponent (30-48 Hz)	Age	54 / 107	-0.014 (-0.032, 0.004)	0.01	-1.57	48.72	0.123
Parietal	Symptoms	Exponent	Exponent (30-48 Hz)	Sex (Male)	54 / 107	-0.670 (-1.098, -0.241)	0.21	-3.14	48.76	0.003	**
Parietal	Symptoms	Exponent	Exponent (30-48 Hz)	CPZ Equivalent	54 / 107	0.000 (-0.000, 0.001)	0	0.81	48.64	0.42
Parietal	Symptoms	Exponent	Exponent (30-48 Hz)	PANSS pos × Condition (EO)	54 / 107	-0.009 (-0.051, 0.034)	0.02	-0.41	50.95	0.686
Parietal	Symptoms	Exponent	Exponent (30-48 Hz)	Intercept	54 / 107	3.185 (2.188, 4.182)	0.5	6.41	53.74	< .001	***
Parietal	Symptoms	Exponent	Exponent (30-48 Hz)	PANSS neg	54 / 107	-0.015 (-0.061, 0.031)	0.02	-0.65	60.13	0.515
Parietal	Symptoms	Exponent	Exponent (30-48 Hz)	Condition (EO)	54 / 107	-0.728 (-1.147, -0.309)	0.21	-3.49	50.8	0.001	**
Parietal	Symptoms	Exponent	Exponent (30-48 Hz)	Age	54 / 107	-0.015 (-0.033, 0.002)	0.01	-1.77	48.79	0.082
Parietal	Symptoms	Exponent	Exponent (30-48 Hz)	Sex (Male)	54 / 107	-0.699 (-1.118, -0.279)	0.21	-3.35	48.63	0.002	**
Parietal	Symptoms	Exponent	Exponent (30-48 Hz)	CPZ Equivalent	54 / 107	0.000 (-0.000, 0.001)	0	0.64	48.49	0.522
Parietal	Symptoms	Exponent	Exponent (30-48 Hz)	PANSS neg × Condition (EO)	54 / 107	0.021 (-0.008, 0.050)	0.01	1.48	50.99	0.145
Parietal	Symptoms	Exponent	Exponent (30-48 Hz)	Intercept	54 / 107	3.494 (2.273, 4.715)	0.61	5.73	58.49	< .001	***
Parietal	Symptoms	Exponent	Exponent (30-48 Hz)	PANSS gen	54 / 107	-0.026 (-0.072, 0.020)	0.02	-1.12	59.53	0.268
Parietal	Symptoms	Exponent	Exponent (30-48 Hz)	Condition (EO)	54 / 107	-0.543 (-1.278, 0.192)	0.37	-1.48	50.75	0.144
Parietal	Symptoms	Exponent	Exponent (30-48 Hz)	Age	54 / 107	-0.014 (-0.031, 0.003)	0.01	-1.61	48.75	0.115
Parietal	Symptoms	Exponent	Exponent (30-48 Hz)	Sex (Male)	54 / 107	-0.665 (-1.084, -0.247)	0.21	-3.2	48.67	0.002	**
Parietal	Symptoms	Exponent	Exponent (30-48 Hz)	CPZ Equivalent	54 / 107	0.000 (-0.000, 0.001)	0	0.98	48.63	0.331
Parietal	Symptoms	Exponent	Exponent (30-48 Hz)	PANSS gen × Condition (EO)	54 / 107	0.004 (-0.025, 0.033)	0.01	0.29	50.81	0.773
Parietal	Cognition	Power	Theta (4-8 Hz)	Intercept	39 / 64	0.399 (0.080, 0.717)	0.16	2.54	35.56	0.016	*
Parietal	Cognition	Power	Theta (4-8 Hz)	BACS composite z	39 / 64	-0.069 (-0.159, 0.022)	0.05	-1.53	50.42	0.133
Parietal	Cognition	Power	Theta (4-8 Hz)	Condition (EO)	39 / 64	-0.173 (-0.260, -0.086)	0.04	-4.07	27.62	< .001	***
Parietal	Cognition	Power	Theta (4-8 Hz)	Age	39 / 64	0.002 (-0.005, 0.009)	0	0.58	35.62	0.565
Parietal	Cognition	Power	Theta (4-8 Hz)	Sex (Male)	39 / 64	0.011 (-0.151, 0.173)	0.08	0.14	33.9	0.893
Parietal	Cognition	Power	Theta (4-8 Hz)	CPZ Equivalent	39 / 64	0.000 (0.000, 0.000)	0	2.46	35.21	0.019	*
Parietal	Cognition	Power	Theta (4-8 Hz)	BACS composite z × Condition (EO)	39 / 64	0.029 (-0.054, 0.112)	0.04	0.72	26.58	0.478
Parietal	Symptoms	Power	Theta (4-8 Hz)	Intercept	39 / 64	0.359 (0.013, 0.705)	0.17	2.1	40.11	0.042	*
Parietal	Symptoms	Power	Theta (4-8 Hz)	PANSS pos	39 / 64	0.003 (-0.022, 0.028)	0.01	0.27	42.14	0.79
Parietal	Symptoms	Power	Theta (4-8 Hz)	Condition (EO)	39 / 64	-0.314 (-0.556, -0.071)	0.12	-2.66	25.89	0.013	*
Parietal	Symptoms	Power	Theta (4-8 Hz)	Age	39 / 64	0.002 (-0.005, 0.009)	0	0.53	35.42	0.599
Parietal	Symptoms	Power	Theta (4-8 Hz)	Sex (Male)	39 / 64	0.004 (-0.170, 0.177)	0.09	0.04	34.03	0.966
Parietal	Symptoms	Power	Theta (4-8 Hz)	CPZ Equivalent	39 / 64	0.000 (0.000, 0.000)	0	2.38	34.13	0.023	*
Parietal	Symptoms	Power	Theta (4-8 Hz)	PANSS pos × Condition (EO)	39 / 64	0.013 (-0.008, 0.035)	0.01	1.31	26.12	0.202
Parietal	Symptoms	Power	Theta (4-8 Hz)	Intercept	39 / 64	0.185 (-0.202, 0.573)	0.19	0.97	38.73	0.338
Parietal	Symptoms	Power	Theta (4-8 Hz)	PANSS neg	39 / 64	0.012 (-0.005, 0.030)	0.01	1.41	44.2	0.165
Parietal	Symptoms	Power	Theta (4-8 Hz)	Condition (EO)	39 / 64	-0.040 (-0.268, 0.188)	0.11	-0.36	26.02	0.719
Parietal	Symptoms	Power	Theta (4-8 Hz)	Age	39 / 64	0.003 (-0.004, 0.011)	0	0.94	35.62	0.352
Parietal	Symptoms	Power	Theta (4-8 Hz)	Sex (Male)	39 / 64	0.008 (-0.156, 0.171)	0.08	0.1	33.92	0.924
Parietal	Symptoms	Power	Theta (4-8 Hz)	CPZ Equivalent	39 / 64	0.000 (0.000, 0.000)	0	2.12	35.89	0.041	*
Parietal	Symptoms	Power	Theta (4-8 Hz)	PANSS neg × Condition (EO)	39 / 64	-0.009 (-0.025, 0.006)	0.01	-1.26	26.44	0.219
Parietal	Symptoms	Power	Theta (4-8 Hz)	Intercept	39 / 64	0.261 (-0.188, 0.709)	0.22	1.17	42.04	0.247
Parietal	Symptoms	Power	Theta (4-8 Hz)	PANSS gen	39 / 64	0.005 (-0.012, 0.021)	0.01	0.59	42.5	0.561
Parietal	Symptoms	Power	Theta (4-8 Hz)	Condition (EO)	39 / 64	-0.178 (-0.580, 0.224)	0.2	-0.91	26.87	0.371
Parietal	Symptoms	Power	Theta (4-8 Hz)	Age	39 / 64	0.002 (-0.005, 0.010)	0	0.63	35.38	0.535
Parietal	Symptoms	Power	Theta (4-8 Hz)	Sex (Male)	39 / 64	0.015 (-0.151, 0.181)	0.08	0.18	33.57	0.856
Parietal	Symptoms	Power	Theta (4-8 Hz)	CPZ Equivalent	39 / 64	0.000 (0.000, 0.000)	0	2.3	34.16	0.028	*
Parietal	Symptoms	Power	Theta (4-8 Hz)	PANSS gen × Condition (EO)	39 / 64	0.000 (-0.015, 0.016)	0.01	0.05	27.05	0.958
Left Temporal	Cognition	Center frequency	iAPF (8-12 Hz)	Intercept	53 / 101	10.708 (10.044, 11.373)	0.33	32.41	46.93	< .001	***
Left Temporal	Cognition	Center frequency	iAPF (8-12 Hz)	BACS composite z	53 / 101	0.086 (-0.106, 0.278)	0.1	0.89	74.52	0.376
Left Temporal	Cognition	Center frequency	iAPF (8-12 Hz)	Condition (EO)	53 / 101	0.212 (0.030, 0.395)	0.09	2.34	46.37	0.024	*
Left Temporal	Cognition	Center frequency	iAPF (8-12 Hz)	Age	53 / 101	-0.010 (-0.024, 0.004)	0.01	-1.38	45.51	0.173
Left Temporal	Cognition	Center frequency	iAPF (8-12 Hz)	Sex (Male)	53 / 101	-0.447 (-0.784, -0.111)	0.17	-2.68	46.43	0.01	*
Left Temporal	Cognition	Center frequency	iAPF (8-12 Hz)	CPZ Equivalent	53 / 101	-0.000 (-0.001, 0.000)	0	-1.73	44.94	0.09
Left Temporal	Cognition	Center frequency	iAPF (8-12 Hz)	BACS composite z × Condition (EO)	53 / 101	-0.089 (-0.278, 0.100)	0.09	-0.95	49.05	0.348
Left Temporal	Symptoms	Center frequency	iAPF (8-12 Hz)	Intercept	53 / 101	10.621 (9.848, 11.394)	0.39	27.48	60.46	< .001	***
Left Temporal	Symptoms	Center frequency	iAPF (8-12 Hz)	PANSS pos	53 / 101	0.017 (-0.039, 0.074)	0.03	0.62	67.65	0.536
Left Temporal	Symptoms	Center frequency	iAPF (8-12 Hz)	Condition (EO)	53 / 101	0.244 (-0.347, 0.834)	0.29	0.83	45.83	0.411
Left Temporal	Symptoms	Center frequency	iAPF (8-12 Hz)	Age	53 / 101	-0.011 (-0.026, 0.003)	0.01	-1.61	45.53	0.114
Left Temporal	Symptoms	Center frequency	iAPF (8-12 Hz)	Sex (Male)	53 / 101	-0.475 (-0.823, -0.127)	0.17	-2.75	46.2	0.009	**
Left Temporal	Symptoms	Center frequency	iAPF (8-12 Hz)	CPZ Equivalent	53 / 101	-0.000 (-0.001, 0.000)	0	-1.9	44.7	0.063
Left Temporal	Symptoms	Center frequency	iAPF (8-12 Hz)	PANSS pos × Condition (EO)	53 / 101	-0.003 (-0.054, 0.048)	0.03	-0.11	45.76	0.911
Left Temporal	Symptoms	Center frequency	iAPF (8-12 Hz)	Intercept	53 / 101	11.028 (10.224, 11.832)	0.4	27.46	57.01	< .001	***
Left Temporal	Symptoms	Center frequency	iAPF (8-12 Hz)	PANSS neg	53 / 101	-0.024 (-0.062, 0.015)	0.02	-1.23	70.39	0.223
Left Temporal	Symptoms	Center frequency	iAPF (8-12 Hz)	Condition (EO)	53 / 101	0.202 (-0.328, 0.732)	0.26	0.77	46.73	0.447
Left Temporal	Symptoms	Center frequency	iAPF (8-12 Hz)	Age	53 / 101	-0.011 (-0.025, 0.003)	0.01	-1.63	46.17	0.111
Left Temporal	Symptoms	Center frequency	iAPF (8-12 Hz)	Sex (Male)	53 / 101	-0.422 (-0.755, -0.090)	0.17	-2.56	46.41	0.014	*
Left Temporal	Symptoms	Center frequency	iAPF (8-12 Hz)	CPZ Equivalent	53 / 101	-0.000 (-0.001, 0.000)	0	-1.27	44.79	0.211
Left Temporal	Symptoms	Center frequency	iAPF (8-12 Hz)	PANSS neg × Condition (EO)	53 / 101	0.001 (-0.035, 0.037)	0.02	0.06	46.38	0.953
Left Temporal	Symptoms	Center frequency	iAPF (8-12 Hz)	Intercept	53 / 101	10.403 (9.379, 11.428)	0.51	20.27	65.44	< .001	***
Left Temporal	Symptoms	Center frequency	iAPF (8-12 Hz)	PANSS gen	53 / 101	0.017 (-0.021, 0.055)	0.02	0.88	67.79	0.38
Left Temporal	Symptoms	Center frequency	iAPF (8-12 Hz)	Condition (EO)	53 / 101	0.241 (-0.667, 1.148)	0.45	0.53	46.38	0.596
Left Temporal	Symptoms	Center frequency	iAPF (8-12 Hz)	Age	53 / 101	-0.011 (-0.025, 0.003)	0.01	-1.63	46.04	0.11
Left Temporal	Symptoms	Center frequency	iAPF (8-12 Hz)	Sex (Male)	53 / 101	-0.473 (-0.812, -0.134)	0.17	-2.81	46.28	0.007	**
Left Temporal	Symptoms	Center frequency	iAPF (8-12 Hz)	CPZ Equivalent	53 / 101	-0.000 (-0.001, -0.000)	0	-2.02	45.23	0.049	*
Left Temporal	Symptoms	Center frequency	iAPF (8-12 Hz)	PANSS gen × Condition (EO)	53 / 101	-0.001 (-0.037, 0.035)	0.02	-0.06	46.58	0.951
Left Temporal	Cognition	Exponent	Exponent (30-48 Hz)	Intercept	54 / 107	1.807 (1.101, 2.513)	0.35	5.14	49.73	< .001	***
Left Temporal	Cognition	Exponent	Exponent (30-48 Hz)	BACS composite z	54 / 107	0.229 (0.031, 0.427)	0.1	2.31	70.2	0.024	*
Left Temporal	Cognition	Exponent	Exponent (30-48 Hz)	Condition (EO)	54 / 107	-0.247 (-0.399, -0.095)	0.08	-3.26	51.15	0.002	**
Left Temporal	Cognition	Exponent	Exponent (30-48 Hz)	Age	54 / 107	-0.010 (-0.025, 0.006)	0.01	-1.28	48.76	0.207
Left Temporal	Cognition	Exponent	Exponent (30-48 Hz)	Sex (Male)	54 / 107	-0.474 (-0.830, -0.117)	0.18	-2.67	48.8	0.01	*
Left Temporal	Cognition	Exponent	Exponent (30-48 Hz)	CPZ Equivalent	54 / 107	0.000 (-0.000, 0.001)	0	1.42	48.82	0.163
Left Temporal	Cognition	Exponent	Exponent (30-48 Hz)	BACS composite z × Condition (EO)	54 / 107	0.027 (-0.129, 0.184)	0.08	0.35	52.63	0.727
Left Temporal	Symptoms	Exponent	Exponent (30-48 Hz)	Intercept	54 / 107	2.010 (1.146, 2.875)	0.43	4.66	57.62	< .001	***
Left Temporal	Symptoms	Exponent	Exponent (30-48 Hz)	PANSS pos	54 / 107	-0.002 (-0.064, 0.060)	0.03	-0.07	62.05	0.945
Left Temporal	Symptoms	Exponent	Exponent (30-48 Hz)	Condition (EO)	54 / 107	-0.166 (-0.662, 0.331)	0.25	-0.67	50.6	0.506
Left Temporal	Symptoms	Exponent	Exponent (30-48 Hz)	Age	54 / 107	-0.014 (-0.031, 0.002)	0.01	-1.75	48.48	0.086
Left Temporal	Symptoms	Exponent	Exponent (30-48 Hz)	Sex (Male)	54 / 107	-0.436 (-0.830, -0.042)	0.2	-2.22	48.52	0.031	*
Left Temporal	Symptoms	Exponent	Exponent (30-48 Hz)	CPZ Equivalent	54 / 107	0.000 (-0.000, 0.001)	0	1	48.38	0.322
Left Temporal	Symptoms	Exponent	Exponent (30-48 Hz)	PANSS pos × Condition (EO)	54 / 107	-0.008 (-0.051, 0.036)	0.02	-0.35	50.76	0.727
Left Temporal	Symptoms	Exponent	Exponent (30-48 Hz)	Intercept	54 / 107	2.430 (1.521, 3.340)	0.45	5.36	55.07	< .001	***
Left Temporal	Symptoms	Exponent	Exponent (30-48 Hz)	PANSS neg	54 / 107	-0.032 (-0.074, 0.010)	0.02	-1.51	63.19	0.135
Left Temporal	Symptoms	Exponent	Exponent (30-48 Hz)	Condition (EO)	54 / 107	-0.511 (-0.942, -0.080)	0.21	-2.38	50.73	0.021	*
Left Temporal	Symptoms	Exponent	Exponent (30-48 Hz)	Age	54 / 107	-0.016 (-0.031, 0.000)	0.01	-1.97	48.72	0.055
Left Temporal	Symptoms	Exponent	Exponent (30-48 Hz)	Sex (Male)	54 / 107	-0.424 (-0.804, -0.044)	0.19	-2.24	48.53	0.03	*
Left Temporal	Symptoms	Exponent	Exponent (30-48 Hz)	CPZ Equivalent	54 / 107	0.000 (-0.000, 0.001)	0	1.3	48.35	0.201
Left Temporal	Symptoms	Exponent	Exponent (30-48 Hz)	PANSS neg × Condition (EO)	54 / 107	0.019 (-0.010, 0.049)	0.01	1.31	50.97	0.197
Left Temporal	Symptoms	Exponent	Exponent (30-48 Hz)	Intercept	54 / 107	2.504 (1.369, 3.639)	0.57	4.41	60.47	< .001	***
Left Temporal	Symptoms	Exponent	Exponent (30-48 Hz)	PANSS gen	54 / 107	-0.024 (-0.066, 0.019)	0.02	-1.1	61.74	0.275
Left Temporal	Symptoms	Exponent	Exponent (30-48 Hz)	Condition (EO)	54 / 107	-0.512 (-1.262, 0.238)	0.37	-1.37	50.54	0.177
Left Temporal	Symptoms	Exponent	Exponent (30-48 Hz)	Age	54 / 107	-0.014 (-0.030, 0.002)	0.01	-1.72	48.54	0.092
Left Temporal	Symptoms	Exponent	Exponent (30-48 Hz)	Sex (Male)	54 / 107	-0.414 (-0.799, -0.029)	0.19	-2.16	48.45	0.036	*
Left Temporal	Symptoms	Exponent	Exponent (30-48 Hz)	CPZ Equivalent	54 / 107	0.000 (-0.000, 0.001)	0	1.24	48.39	0.22
Left Temporal	Symptoms	Exponent	Exponent (30-48 Hz)	PANSS gen × Condition (EO)	54 / 107	0.011 (-0.019, 0.041)	0.01	0.72	50.61	0.474
Left Temporal	Cognition	Power	Theta (4-8 Hz)	Intercept	38 / 64	0.396 (0.137, 0.655)	0.13	3.11	31.98	0.004	**
Left Temporal	Cognition	Power	Theta (4-8 Hz)	BACS composite z	38 / 64	-0.032 (-0.102, 0.039)	0.04	-0.91	48.54	0.368
Left Temporal	Cognition	Power	Theta (4-8 Hz)	Condition (EO)	38 / 64	-0.111 (-0.195, -0.027)	0.04	-2.71	28.13	0.011	*
Left Temporal	Cognition	Power	Theta (4-8 Hz)	Age	38 / 64	-0.002 (-0.008, 0.004)	0	-0.7	31.18	0.489
Left Temporal	Cognition	Power	Theta (4-8 Hz)	Sex (Male)	38 / 64	0.108 (-0.025, 0.240)	0.07	1.65	32.02	0.109
Left Temporal	Cognition	Power	Theta (4-8 Hz)	CPZ Equivalent	38 / 64	0.000 (0.000, 0.000)	0	2.84	28.36	0.008	**
Left Temporal	Cognition	Power	Theta (4-8 Hz)	BACS composite z × Condition (EO)	38 / 64	-0.010 (-0.084, 0.063)	0.04	-0.29	27.82	0.777
Left Temporal	Symptoms	Power	Theta (4-8 Hz)	Intercept	38 / 64	0.250 (-0.029, 0.530)	0.14	1.81	41.19	0.078
Left Temporal	Symptoms	Power	Theta (4-8 Hz)	PANSS pos	38 / 64	0.016 (-0.004, 0.036)	0.01	1.58	44.8	0.121
Left Temporal	Symptoms	Power	Theta (4-8 Hz)	Condition (EO)	38 / 64	-0.027 (-0.264, 0.210)	0.12	-0.23	27.96	0.819
Left Temporal	Symptoms	Power	Theta (4-8 Hz)	Age	38 / 64	-0.002 (-0.008, 0.004)	0	-0.64	32.39	0.528
Left Temporal	Symptoms	Power	Theta (4-8 Hz)	Sex (Male)	38 / 64	0.067 (-0.078, 0.212)	0.07	0.95	32.52	0.351
Left Temporal	Symptoms	Power	Theta (4-8 Hz)	CPZ Equivalent	38 / 64	0.000 (0.000, 0.000)	0	2.39	28.68	0.024	*
Left Temporal	Symptoms	Power	Theta (4-8 Hz)	PANSS pos × Condition (EO)	38 / 64	-0.008 (-0.027, 0.012)	0.01	-0.79	26.96	0.435
Left Temporal	Symptoms	Power	Theta (4-8 Hz)	Intercept	38 / 64	0.288 (-0.046, 0.622)	0.17	1.74	38.78	0.089
Left Temporal	Symptoms	Power	Theta (4-8 Hz)	PANSS neg	38 / 64	0.004 (-0.011, 0.020)	0.01	0.57	45.22	0.571
Left Temporal	Symptoms	Power	Theta (4-8 Hz)	Condition (EO)	38 / 64	-0.040 (-0.267, 0.187)	0.11	-0.36	24.86	0.72
Left Temporal	Symptoms	Power	Theta (4-8 Hz)	Age	38 / 64	-0.001 (-0.007, 0.005)	0	-0.25	33.23	0.806
Left Temporal	Symptoms	Power	Theta (4-8 Hz)	Sex (Male)	38 / 64	0.104 (-0.034, 0.242)	0.07	1.53	31.8	0.136
Left Temporal	Symptoms	Power	Theta (4-8 Hz)	CPZ Equivalent	38 / 64	0.000 (0.000, 0.000)	0	2.63	29.04	0.013	*
Left Temporal	Symptoms	Power	Theta (4-8 Hz)	PANSS neg × Condition (EO)	38 / 64	-0.005 (-0.020, 0.010)	0.01	-0.71	25	0.486
Left Temporal	Symptoms	Power	Theta (4-8 Hz)	Intercept	38 / 64	0.150 (-0.245, 0.544)	0.2	0.76	43.2	0.449
Left Temporal	Symptoms	Power	Theta (4-8 Hz)	PANSS gen	38 / 64	0.009 (-0.006, 0.023)	0.01	1.24	43.88	0.222
Left Temporal	Symptoms	Power	Theta (4-8 Hz)	Condition (EO)	38 / 64	0.111 (-0.243, 0.465)	0.17	0.64	26.31	0.525
Left Temporal	Symptoms	Power	Theta (4-8 Hz)	Age	38 / 64	-0.001 (-0.007, 0.005)	0	-0.3	32.09	0.767
Left Temporal	Symptoms	Power	Theta (4-8 Hz)	Sex (Male)	38 / 64	0.093 (-0.047, 0.234)	0.07	1.36	31.65	0.184
Left Temporal	Symptoms	Power	Theta (4-8 Hz)	CPZ Equivalent	38 / 64	0.000 (0.000, 0.000)	0	2.43	28.71	0.022	*
Left Temporal	Symptoms	Power	Theta (4-8 Hz)	PANSS gen × Condition (EO)	38 / 64	-0.009 (-0.023, 0.005)	0.01	-1.33	25.85	0.195
Right Temporal	Cognition	Center frequency	iAPF (8-12 Hz)	Intercept	54 / 102	10.574 (9.906, 11.242)	0.33	31.79	49.18	< .001	***
Right Temporal	Cognition	Center frequency	iAPF (8-12 Hz)	BACS composite z	54 / 102	0.107 (-0.097, 0.311)	0.1	1.04	83.19	0.3
Right Temporal	Cognition	Center frequency	iAPF (8-12 Hz)	Condition (EO)	54 / 102	0.239 (0.016, 0.462)	0.11	2.16	48.06	0.036	*
Right Temporal	Cognition	Center frequency	iAPF (8-12 Hz)	Age	54 / 102	-0.008 (-0.022, 0.006)	0.01	-1.11	46.96	0.274
Right Temporal	Cognition	Center frequency	iAPF (8-12 Hz)	Sex (Male)	54 / 102	-0.336 (-0.674, 0.003)	0.17	-2	48.22	0.052
Right Temporal	Cognition	Center frequency	iAPF (8-12 Hz)	CPZ Equivalent	54 / 102	-0.000 (-0.001, 0.000)	0	-1.36	46	0.182
Right Temporal	Cognition	Center frequency	iAPF (8-12 Hz)	BACS composite z × Condition (EO)	54 / 102	-0.102 (-0.334, 0.130)	0.12	-0.88	52.53	0.383
Right Temporal	Symptoms	Center frequency	iAPF (8-12 Hz)	Intercept	54 / 102	10.331 (9.528, 11.134)	0.4	25.67	67.3	< .001	***
Right Temporal	Symptoms	Center frequency	iAPF (8-12 Hz)	PANSS pos	54 / 102	0.029 (-0.030, 0.088)	0.03	0.99	75.75	0.324
Right Temporal	Symptoms	Center frequency	iAPF (8-12 Hz)	Condition (EO)	54 / 102	0.791 (0.077, 1.505)	0.35	2.23	47.42	0.031	*
Right Temporal	Symptoms	Center frequency	iAPF (8-12 Hz)	Age	54 / 102	-0.009 (-0.024, 0.005)	0.01	-1.3	47.17	0.2
Right Temporal	Symptoms	Center frequency	iAPF (8-12 Hz)	Sex (Male)	54 / 102	-0.348 (-0.698, 0.003)	0.17	-2	47.94	0.052
Right Temporal	Symptoms	Center frequency	iAPF (8-12 Hz)	CPZ Equivalent	54 / 102	-0.000 (-0.001, 0.000)	0	-1.43	45.34	0.159
Right Temporal	Symptoms	Center frequency	iAPF (8-12 Hz)	PANSS pos × Condition (EO)	54 / 102	-0.050 (-0.112, 0.012)	0.03	-1.63	47.15	0.11
Right Temporal	Symptoms	Center frequency	iAPF (8-12 Hz)	Intercept	54 / 102	11.001 (10.170, 11.831)	0.42	26.46	63.78	< .001	***
Right Temporal	Symptoms	Center frequency	iAPF (8-12 Hz)	PANSS neg	54 / 102	-0.030 (-0.070, 0.011)	0.02	-1.46	80.02	0.149
Right Temporal	Symptoms	Center frequency	iAPF (8-12 Hz)	Condition (EO)	54 / 102	0.131 (-0.523, 0.785)	0.33	0.4	49.05	0.689
Right Temporal	Symptoms	Center frequency	iAPF (8-12 Hz)	Age	54 / 102	-0.010 (-0.024, 0.004)	0.01	-1.44	48.27	0.157
Right Temporal	Symptoms	Center frequency	iAPF (8-12 Hz)	Sex (Male)	54 / 102	-0.311 (-0.644, 0.022)	0.17	-1.88	48.25	0.067
Right Temporal	Symptoms	Center frequency	iAPF (8-12 Hz)	CPZ Equivalent	54 / 102	-0.000 (-0.001, 0.000)	0	-0.9	45.72	0.374
Right Temporal	Symptoms	Center frequency	iAPF (8-12 Hz)	PANSS neg × Condition (EO)	54 / 102	0.008 (-0.036, 0.053)	0.02	0.37	48.62	0.714
Right Temporal	Symptoms	Center frequency	iAPF (8-12 Hz)	Intercept	54 / 102	10.520 (9.439, 11.600)	0.54	19.39	74.5	< .001	***
Right Temporal	Symptoms	Center frequency	iAPF (8-12 Hz)	PANSS gen	54 / 102	0.004 (-0.037, 0.045)	0.02	0.2	76.9	0.845
Right Temporal	Symptoms	Center frequency	iAPF (8-12 Hz)	Condition (EO)	54 / 102	0.482 (-0.628, 1.593)	0.55	0.87	47.37	0.387
Right Temporal	Symptoms	Center frequency	iAPF (8-12 Hz)	Age	54 / 102	-0.009 (-0.023, 0.005)	0.01	-1.26	47.6	0.215
Right Temporal	Symptoms	Center frequency	iAPF (8-12 Hz)	Sex (Male)	54 / 102	-0.334 (-0.678, 0.009)	0.17	-1.96	47.86	0.056
Right Temporal	Symptoms	Center frequency	iAPF (8-12 Hz)	CPZ Equivalent	54 / 102	-0.000 (-0.001, 0.000)	0	-1.32	45.7	0.192
Right Temporal	Symptoms	Center frequency	iAPF (8-12 Hz)	PANSS gen × Condition (EO)	54 / 102	-0.010 (-0.054, 0.034)	0.02	-0.45	47.23	0.654
Right Temporal	Cognition	Exponent	Exponent (30-48 Hz)	Intercept	54 / 107	2.002 (1.234, 2.769)	0.38	5.24	49.64	< .001	***
Right Temporal	Cognition	Exponent	Exponent (30-48 Hz)	BACS composite z	54 / 107	0.266 (0.056, 0.477)	0.11	2.52	65.84	0.014	*
Right Temporal	Cognition	Exponent	Exponent (30-48 Hz)	Condition (EO)	54 / 107	-0.280 (-0.424, -0.136)	0.07	-3.91	51.22	< .001	***
Right Temporal	Cognition	Exponent	Exponent (30-48 Hz)	Age	54 / 107	-0.012 (-0.028, 0.005)	0.01	-1.42	48.91	0.163
Right Temporal	Cognition	Exponent	Exponent (30-48 Hz)	Sex (Male)	54 / 107	-0.510 (-0.898, -0.122)	0.19	-2.64	48.94	0.011	*
Right Temporal	Cognition	Exponent	Exponent (30-48 Hz)	CPZ Equivalent	54 / 107	0.000 (-0.000, 0.001)	0	1.58	48.96	0.121
Right Temporal	Cognition	Exponent	Exponent (30-48 Hz)	BACS composite z × Condition (EO)	54 / 107	0.005 (-0.144, 0.153)	0.07	0.06	52.41	0.951
Right Temporal	Symptoms	Exponent	Exponent (30-48 Hz)	Intercept	54 / 107	2.173 (1.241, 3.105)	0.47	4.67	55.63	< .001	***
Right Temporal	Symptoms	Exponent	Exponent (30-48 Hz)	PANSS pos	54 / 107	0.005 (-0.062, 0.072)	0.03	0.16	59.02	0.877
Right Temporal	Symptoms	Exponent	Exponent (30-48 Hz)	Condition (EO)	54 / 107	-0.175 (-0.645, 0.294)	0.23	-0.75	50.81	0.457
Right Temporal	Symptoms	Exponent	Exponent (30-48 Hz)	Age	54 / 107	-0.017 (-0.035, 0.001)	0.01	-1.93	48.72	0.059
Right Temporal	Symptoms	Exponent	Exponent (30-48 Hz)	Sex (Male)	54 / 107	-0.480 (-0.910, -0.051)	0.21	-2.25	48.75	0.029	*
Right Temporal	Symptoms	Exponent	Exponent (30-48 Hz)	CPZ Equivalent	54 / 107	0.000 (-0.000, 0.001)	0	1.08	48.64	0.286
Right Temporal	Symptoms	Exponent	Exponent (30-48 Hz)	PANSS pos × Condition (EO)	54 / 107	-0.010 (-0.051, 0.031)	0.02	-0.48	50.93	0.633
Right Temporal	Symptoms	Exponent	Exponent (30-48 Hz)	Intercept	54 / 107	2.612 (1.629, 3.594)	0.49	5.33	53.87	< .001	***
Right Temporal	Symptoms	Exponent	Exponent (30-48 Hz)	PANSS neg	54 / 107	-0.030 (-0.075, 0.016)	0.02	-1.31	60.24	0.196
Right Temporal	Symptoms	Exponent	Exponent (30-48 Hz)	Condition (EO)	54 / 107	-0.452 (-0.864, -0.040)	0.21	-2.2	50.94	0.032	*
Right Temporal	Symptoms	Exponent	Exponent (30-48 Hz)	Age	54 / 107	-0.018 (-0.035, -0.001)	0.01	-2.1	48.94	0.041	*
Right Temporal	Symptoms	Exponent	Exponent (30-48 Hz)	Sex (Male)	54 / 107	-0.457 (-0.871, -0.044)	0.21	-2.22	48.78	0.031	*
Right Temporal	Symptoms	Exponent	Exponent (30-48 Hz)	CPZ Equivalent	54 / 107	0.000 (-0.000, 0.001)	0	1.43	48.64	0.158
Right Temporal	Symptoms	Exponent	Exponent (30-48 Hz)	PANSS neg × Condition (EO)	54 / 107	0.013 (-0.016, 0.041)	0.01	0.88	51.13	0.381
Right Temporal	Symptoms	Exponent	Exponent (30-48 Hz)	Intercept	54 / 107	2.808 (1.596, 4.020)	0.61	4.64	58.07	< .001	***
Right Temporal	Symptoms	Exponent	Exponent (30-48 Hz)	PANSS gen	54 / 107	-0.029 (-0.075, 0.017)	0.02	-1.27	59.06	0.208
Right Temporal	Symptoms	Exponent	Exponent (30-48 Hz)	Condition (EO)	54 / 107	-0.378 (-1.091, 0.335)	0.36	-1.06	50.79	0.293
Right Temporal	Symptoms	Exponent	Exponent (30-48 Hz)	Age	54 / 107	-0.016 (-0.033, 0.002)	0.01	-1.82	48.79	0.075
Right Temporal	Symptoms	Exponent	Exponent (30-48 Hz)	Sex (Male)	54 / 107	-0.433 (-0.849, -0.018)	0.21	-2.09	48.72	0.041	*
Right Temporal	Symptoms	Exponent	Exponent (30-48 Hz)	CPZ Equivalent	54 / 107	0.000 (-0.000, 0.001)	0	1.52	48.67	0.136
Right Temporal	Symptoms	Exponent	Exponent (30-48 Hz)	PANSS gen × Condition (EO)	54 / 107	0.004 (-0.025, 0.032)	0.01	0.27	50.85	0.784
Right Temporal	Cognition	Power	Theta (4-8 Hz)	Intercept	39 / 65	0.285 (-0.026, 0.597)	0.15	1.86	34.5	0.072
Right Temporal	Cognition	Power	Theta (4-8 Hz)	BACS composite z	39 / 65	-0.042 (-0.120, 0.035)	0.04	-1.1	48.36	0.278
Right Temporal	Cognition	Power	Theta (4-8 Hz)	Condition (EO)	39 / 65	-0.112 (-0.189, -0.035)	0.04	-2.97	27.84	0.006	**
Right Temporal	Cognition	Power	Theta (4-8 Hz)	Age	39 / 65	0.001 (-0.006, 0.009)	0	0.37	35.54	0.716
Right Temporal	Cognition	Power	Theta (4-8 Hz)	Sex (Male)	39 / 65	0.077 (-0.064, 0.218)	0.07	1.11	32.24	0.274
Right Temporal	Cognition	Power	Theta (4-8 Hz)	CPZ Equivalent	39 / 65	0.000 (0.000, 0.000)	0	3.07	33.6	0.004	**
Right Temporal	Cognition	Power	Theta (4-8 Hz)	BACS composite z × Condition (EO)	39 / 65	0.019 (-0.051, 0.088)	0.03	0.55	26.77	0.587
Right Temporal	Symptoms	Power	Theta (4-8 Hz)	Intercept	39 / 65	0.173 (-0.149, 0.495)	0.16	1.09	38.9	0.283
Right Temporal	Symptoms	Power	Theta (4-8 Hz)	PANSS pos	39 / 65	0.011 (-0.011, 0.032)	0.01	1.01	44	0.32
Right Temporal	Symptoms	Power	Theta (4-8 Hz)	Condition (EO)	39 / 65	-0.066 (-0.289, 0.158)	0.11	-0.61	26.93	0.55
Right Temporal	Symptoms	Power	Theta (4-8 Hz)	Age	39 / 65	0.002 (-0.005, 0.009)	0	0.51	35.38	0.611
Right Temporal	Symptoms	Power	Theta (4-8 Hz)	Sex (Male)	39 / 65	0.050 (-0.098, 0.198)	0.07	0.69	32.94	0.498
Right Temporal	Symptoms	Power	Theta (4-8 Hz)	CPZ Equivalent	39 / 65	0.000 (0.000, 0.000)	0	2.8	32.74	0.008	**
Right Temporal	Symptoms	Power	Theta (4-8 Hz)	PANSS pos × Condition (EO)	39 / 65	-0.004 (-0.023, 0.015)	0.01	-0.43	25.92	0.668
Right Temporal	Symptoms	Power	Theta (4-8 Hz)	Intercept	39 / 65	0.178 (-0.182, 0.539)	0.18	1	36.84	0.323
Right Temporal	Symptoms	Power	Theta (4-8 Hz)	PANSS neg	39 / 65	0.004 (-0.011, 0.019)	0.01	0.55	44.88	0.587
Right Temporal	Symptoms	Power	Theta (4-8 Hz)	Condition (EO)	39 / 65	-0.024 (-0.234, 0.186)	0.1	-0.23	26.95	0.818
Right Temporal	Symptoms	Power	Theta (4-8 Hz)	Age	39 / 65	0.003 (-0.004, 0.009)	0	0.74	34.6	0.465
Right Temporal	Symptoms	Power	Theta (4-8 Hz)	Sex (Male)	39 / 65	0.068 (-0.075, 0.211)	0.07	0.97	32.4	0.34
Right Temporal	Symptoms	Power	Theta (4-8 Hz)	CPZ Equivalent	39 / 65	0.000 (0.000, 0.001)	0	3.07	34.39	0.004	**
Right Temporal	Symptoms	Power	Theta (4-8 Hz)	PANSS neg × Condition (EO)	39 / 65	-0.006 (-0.020, 0.008)	0.01	-0.91	26.25	0.373
Right Temporal	Symptoms	Power	Theta (4-8 Hz)	Intercept	39 / 65	0.085 (-0.322, 0.492)	0.2	0.42	40.62	0.675
Right Temporal	Symptoms	Power	Theta (4-8 Hz)	PANSS gen	39 / 65	0.008 (-0.007, 0.022)	0.01	1.06	43.51	0.294
Right Temporal	Symptoms	Power	Theta (4-8 Hz)	Condition (EO)	39 / 65	0.030 (-0.312, 0.373)	0.17	0.18	27.2	0.857
Right Temporal	Symptoms	Power	Theta (4-8 Hz)	Age	39 / 65	0.002 (-0.005, 0.009)	0	0.63	35.14	0.535
Right Temporal	Symptoms	Power	Theta (4-8 Hz)	Sex (Male)	39 / 65	0.058 (-0.086, 0.202)	0.07	0.82	32.56	0.418
Right Temporal	Symptoms	Power	Theta (4-8 Hz)	CPZ Equivalent	39 / 65	0.000 (0.000, 0.000)	0	2.82	32.64	0.008	**
Right Temporal	Symptoms	Power	Theta (4-8 Hz)	PANSS gen × Condition (EO)	39 / 65	-0.006 (-0.019, 0.008)	0.01	-0.86	26.96	0.398
Occipital	Cognition	Center frequency	iAPF (8-12 Hz)	Intercept	53 / 104	10.396 (9.670, 11.122)	0.36	28.74	50.83	< .001	***
Occipital	Cognition	Center frequency	iAPF (8-12 Hz)	BACS composite z	53 / 104	0.059 (-0.173, 0.291)	0.12	0.5	90.32	0.615
Occipital	Cognition	Center frequency	iAPF (8-12 Hz)	Condition (EO)	53 / 104	0.356 (0.086, 0.626)	0.13	2.65	50.66	0.011	*
Occipital	Cognition	Center frequency	iAPF (8-12 Hz)	Age	53 / 104	-0.003 (-0.019, 0.012)	0.01	-0.45	47.85	0.652
Occipital	Cognition	Center frequency	iAPF (8-12 Hz)	Sex (Male)	53 / 104	-0.388 (-0.751, -0.024)	0.18	-2.14	47.97	0.037	*
Occipital	Cognition	Center frequency	iAPF (8-12 Hz)	CPZ Equivalent	53 / 104	-0.000 (-0.001, 0.000)	0	-1.11	48.1	0.274
Occipital	Cognition	Center frequency	iAPF (8-12 Hz)	BACS composite z × Condition (EO)	53 / 104	0.136 (-0.142, 0.414)	0.14	0.98	54.68	0.331
Occipital	Symptoms	Center frequency	iAPF (8-12 Hz)	Intercept	53 / 104	10.161 (9.259, 11.064)	0.45	22.43	73.95	< .001	***
Occipital	Symptoms	Center frequency	iAPF (8-12 Hz)	PANSS pos	53 / 104	0.032 (-0.036, 0.099)	0.03	0.93	83.88	0.353
Occipital	Symptoms	Center frequency	iAPF (8-12 Hz)	Condition (EO)	53 / 104	0.945 (0.076, 1.813)	0.43	2.18	50.91	0.034	*
Occipital	Symptoms	Center frequency	iAPF (8-12 Hz)	Age	53 / 104	-0.006 (-0.022, 0.010)	0.01	-0.75	48.08	0.459
Occipital	Symptoms	Center frequency	iAPF (8-12 Hz)	Sex (Male)	53 / 104	-0.378 (-0.763, 0.006)	0.19	-1.98	48.58	0.054
Occipital	Symptoms	Center frequency	iAPF (8-12 Hz)	CPZ Equivalent	53 / 104	-0.000 (-0.001, 0.000)	0	-1.26	47.99	0.214
Occipital	Symptoms	Center frequency	iAPF (8-12 Hz)	PANSS pos × Condition (EO)	53 / 104	-0.055 (-0.130, 0.021)	0.04	-1.46	50.94	0.152
Occipital	Symptoms	Center frequency	iAPF (8-12 Hz)	Intercept	53 / 104	10.813 (9.888, 11.738)	0.46	23.33	68.8	< .001	***
Occipital	Symptoms	Center frequency	iAPF (8-12 Hz)	PANSS neg	53 / 104	-0.026 (-0.073, 0.020)	0.02	-1.14	87.79	0.258
Occipital	Symptoms	Center frequency	iAPF (8-12 Hz)	Condition (EO)	53 / 104	0.349 (-0.436, 1.134)	0.39	0.89	51.39	0.376
Occipital	Symptoms	Center frequency	iAPF (8-12 Hz)	Age	53 / 104	-0.007 (-0.022, 0.009)	0.01	-0.87	48.84	0.388
Occipital	Symptoms	Center frequency	iAPF (8-12 Hz)	Sex (Male)	53 / 104	-0.340 (-0.704, 0.025)	0.18	-1.87	48.59	0.067
Occipital	Symptoms	Center frequency	iAPF (8-12 Hz)	CPZ Equivalent	53 / 104	-0.000 (-0.001, 0.000)	0	-0.78	47.97	0.441
Occipital	Symptoms	Center frequency	iAPF (8-12 Hz)	PANSS neg × Condition (EO)	53 / 104	0.000 (-0.054, 0.054)	0.03	0	51.57	0.997
Occipital	Symptoms	Center frequency	iAPF (8-12 Hz)	Intercept	53 / 104	10.607 (9.382, 11.832)	0.62	17.23	81.92	< .001	***
Occipital	Symptoms	Center frequency	iAPF (8-12 Hz)	PANSS gen	53 / 104	-0.005 (-0.051, 0.042)	0.02	-0.2	85.04	0.843
Occipital	Symptoms	Center frequency	iAPF (8-12 Hz)	Condition (EO)	53 / 104	0.056 (-1.283, 1.395)	0.67	0.08	50.5	0.934
Occipital	Symptoms	Center frequency	iAPF (8-12 Hz)	Age	53 / 104	-0.006 (-0.021, 0.010)	0.01	-0.74	48.43	0.461
Occipital	Symptoms	Center frequency	iAPF (8-12 Hz)	Sex (Male)	53 / 104	-0.372 (-0.747, 0.003)	0.19	-1.99	48.41	0.052
Occipital	Symptoms	Center frequency	iAPF (8-12 Hz)	CPZ Equivalent	53 / 104	-0.000 (-0.001, 0.000)	0	-1.22	48.21	0.228
Occipital	Symptoms	Center frequency	iAPF (8-12 Hz)	PANSS gen × Condition (EO)	53 / 104	0.012 (-0.041, 0.065)	0.03	0.44	50.5	0.659
Occipital	Cognition	Exponent	Exponent (30-48 Hz)	Intercept	54 / 107	1.269 (0.577, 1.961)	0.34	3.69	49.57	< .001	***
Occipital	Cognition	Exponent	Exponent (30-48 Hz)	BACS composite z	54 / 107	0.095 (-0.100, 0.291)	0.1	0.97	71.68	0.333
Occipital	Cognition	Exponent	Exponent (30-48 Hz)	Condition (EO)	54 / 107	-0.288 (-0.444, -0.132)	0.08	-3.71	50.93	< .001	***
Occipital	Cognition	Exponent	Exponent (30-48 Hz)	Age	54 / 107	-0.002 (-0.017, 0.013)	0.01	-0.33	48.51	0.742
Occipital	Cognition	Exponent	Exponent (30-48 Hz)	Sex (Male)	54 / 107	-0.308 (-0.657, 0.041)	0.17	-1.77	48.55	0.083
Occipital	Cognition	Exponent	Exponent (30-48 Hz)	CPZ Equivalent	54 / 107	0.000 (-0.000, 0.001)	0	0.68	48.57	0.497
Occipital	Cognition	Exponent	Exponent (30-48 Hz)	BACS composite z × Condition (EO)	54 / 107	-0.010 (-0.170, 0.151)	0.08	-0.12	52.5	0.903
Occipital	Symptoms	Exponent	Exponent (30-48 Hz)	Intercept	54 / 107	1.321 (0.523, 2.118)	0.4	3.31	59.7	0.002	**
Occipital	Symptoms	Exponent	Exponent (30-48 Hz)	PANSS pos	54 / 107	-0.006 (-0.064, 0.051)	0.03	-0.22	64.99	0.828
Occipital	Symptoms	Exponent	Exponent (30-48 Hz)	Condition (EO)	54 / 107	0.022 (-0.479, 0.524)	0.25	0.09	50.79	0.929
Occipital	Symptoms	Exponent	Exponent (30-48 Hz)	Age	54 / 107	-0.003 (-0.018, 0.012)	0.01	-0.39	48.64	0.696
Occipital	Symptoms	Exponent	Exponent (30-48 Hz)	Sex (Male)	54 / 107	-0.265 (-0.626, 0.096)	0.18	-1.48	48.69	0.146
Occipital	Symptoms	Exponent	Exponent (30-48 Hz)	CPZ Equivalent	54 / 107	0.000 (-0.000, 0.001)	0	0.77	48.53	0.444
Occipital	Symptoms	Exponent	Exponent (30-48 Hz)	PANSS pos × Condition (EO)	54 / 107	-0.029 (-0.072, 0.015)	0.02	-1.31	50.97	0.197
Occipital	Symptoms	Exponent	Exponent (30-48 Hz)	Intercept	54 / 107	1.542 (0.689, 2.395)	0.43	3.62	56.35	< .001	***
Occipital	Symptoms	Exponent	Exponent (30-48 Hz)	PANSS neg	54 / 107	-0.015 (-0.055, 0.025)	0.02	-0.73	66.03	0.467
Occipital	Symptoms	Exponent	Exponent (30-48 Hz)	Condition (EO)	54 / 107	-0.541 (-0.984, -0.098)	0.22	-2.45	50.71	0.018	*
Occipital	Symptoms	Exponent	Exponent (30-48 Hz)	Age	54 / 107	-0.005 (-0.019, 0.010)	0.01	-0.62	48.68	0.539
Occipital	Symptoms	Exponent	Exponent (30-48 Hz)	Sex (Male)	54 / 107	-0.291 (-0.645, 0.063)	0.18	-1.65	48.46	0.105
Occipital	Symptoms	Exponent	Exponent (30-48 Hz)	CPZ Equivalent	54 / 107	0.000 (-0.000, 0.001)	0	0.6	48.26	0.553
Occipital	Symptoms	Exponent	Exponent (30-48 Hz)	PANSS neg × Condition (EO)	54 / 107	0.019 (-0.012, 0.049)	0.02	1.22	50.98	0.229
Occipital	Symptoms	Exponent	Exponent (30-48 Hz)	Intercept	54 / 107	1.741 (0.691, 2.791)	0.53	3.31	63.72	0.002	**
Occipital	Symptoms	Exponent	Exponent (30-48 Hz)	PANSS gen	54 / 107	-0.021 (-0.061, 0.019)	0.02	-1.06	65.3	0.294
Occipital	Symptoms	Exponent	Exponent (30-48 Hz)	Condition (EO)	54 / 107	-0.157 (-0.930, 0.616)	0.38	-0.41	50.67	0.685
Occipital	Symptoms	Exponent	Exponent (30-48 Hz)	Age	54 / 107	-0.003 (-0.018, 0.012)	0.01	-0.4	48.65	0.689
Occipital	Symptoms	Exponent	Exponent (30-48 Hz)	Sex (Male)	54 / 107	-0.259 (-0.610, 0.092)	0.17	-1.48	48.54	0.145
Occipital	Symptoms	Exponent	Exponent (30-48 Hz)	CPZ Equivalent	54 / 107	0.000 (-0.000, 0.001)	0	0.99	48.48	0.329
Occipital	Symptoms	Exponent	Exponent (30-48 Hz)	PANSS gen × Condition (EO)	54 / 107	-0.005 (-0.036, 0.025)	0.02	-0.35	50.75	0.728
Occipital	Cognition	Power	Theta (4-8 Hz)	Intercept	52 / 82	0.374 (0.138, 0.611)	0.12	3.19	48.68	0.002	**
Occipital	Cognition	Power	Theta (4-8 Hz)	BACS composite z	52 / 82	-0.020 (-0.086, 0.047)	0.03	-0.59	66.91	0.556
Occipital	Cognition	Power	Theta (4-8 Hz)	Condition (EO)	52 / 82	-0.131 (-0.202, -0.060)	0.03	-3.75	36.03	< .001	***
Occipital	Cognition	Power	Theta (4-8 Hz)	Age	52 / 82	0.000 (-0.005, 0.005)	0	0.15	50.1	0.884
Occipital	Cognition	Power	Theta (4-8 Hz)	Sex (Male)	52 / 82	0.025 (-0.092, 0.141)	0.06	0.42	46.41	0.675
Occipital	Cognition	Power	Theta (4-8 Hz)	CPZ Equivalent	52 / 82	0.000 (0.000, 0.000)	0	2.41	48.21	0.02	*
Occipital	Cognition	Power	Theta (4-8 Hz)	BACS composite z × Condition (EO)	52 / 82	0.010 (-0.055, 0.074)	0.03	0.3	33.51	0.767
Occipital	Symptoms	Power	Theta (4-8 Hz)	Intercept	52 / 82	0.333 (0.068, 0.599)	0.13	2.51	57.9	0.015	*
Occipital	Symptoms	Power	Theta (4-8 Hz)	PANSS pos	52 / 82	0.005 (-0.015, 0.024)	0.01	0.5	62.86	0.619
Occipital	Symptoms	Power	Theta (4-8 Hz)	Condition (EO)	52 / 82	-0.144 (-0.363, 0.075)	0.11	-1.33	33.82	0.191
Occipital	Symptoms	Power	Theta (4-8 Hz)	Age	52 / 82	0.000 (-0.005, 0.005)	0	0.14	48.82	0.891
Occipital	Symptoms	Power	Theta (4-8 Hz)	Sex (Male)	52 / 82	0.013 (-0.109, 0.134)	0.06	0.21	46.38	0.835
Occipital	Symptoms	Power	Theta (4-8 Hz)	CPZ Equivalent	52 / 82	0.000 (0.000, 0.000)	0	2.21	46.51	0.032	*
Occipital	Symptoms	Power	Theta (4-8 Hz)	PANSS pos × Condition (EO)	52 / 82	0.001 (-0.018, 0.020)	0.01	0.13	34.01	0.9
Occipital	Symptoms	Power	Theta (4-8 Hz)	Intercept	52 / 82	0.350 (0.063, 0.636)	0.14	2.44	57.16	0.018	*
Occipital	Symptoms	Power	Theta (4-8 Hz)	PANSS neg	52 / 82	-0.000 (-0.014, 0.013)	0.01	-0.04	64.97	0.972
Occipital	Symptoms	Power	Theta (4-8 Hz)	Condition (EO)	52 / 82	-0.010 (-0.209, 0.189)	0.1	-0.1	32.44	0.92
Occipital	Symptoms	Power	Theta (4-8 Hz)	Age	52 / 82	0.001 (-0.004, 0.006)	0	0.38	50.32	0.703
Occipital	Symptoms	Power	Theta (4-8 Hz)	Sex (Male)	52 / 82	0.021 (-0.096, 0.139)	0.06	0.36	45.98	0.721
Occipital	Symptoms	Power	Theta (4-8 Hz)	CPZ Equivalent	52 / 82	0.000 (0.000, 0.000)	0	2.59	47.86	0.013	*
Occipital	Symptoms	Power	Theta (4-8 Hz)	PANSS neg × Condition (EO)	52 / 82	-0.008 (-0.022, 0.005)	0.01	-1.3	31.86	0.204
Occipital	Symptoms	Power	Theta (4-8 Hz)	Intercept	52 / 82	0.234 (-0.122, 0.589)	0.18	1.31	58.8	0.194
Occipital	Symptoms	Power	Theta (4-8 Hz)	PANSS gen	52 / 82	0.006 (-0.007, 0.019)	0.01	0.88	59.69	0.385
Occipital	Symptoms	Power	Theta (4-8 Hz)	Condition (EO)	52 / 82	0.051 (-0.281, 0.382)	0.16	0.31	32.82	0.759
Occipital	Symptoms	Power	Theta (4-8 Hz)	Age	52 / 82	0.001 (-0.004, 0.006)	0	0.26	49.41	0.798
Occipital	Symptoms	Power	Theta (4-8 Hz)	Sex (Male)	52 / 82	0.018 (-0.100, 0.136)	0.06	0.3	46.36	0.762
Occipital	Symptoms	Power	Theta (4-8 Hz)	CPZ Equivalent	52 / 82	0.000 (0.000, 0.000)	0	2.17	46.96	0.035	*
Occipital	Symptoms	Power	Theta (4-8 Hz)	PANSS gen × Condition (EO)	52 / 82	-0.007 (-0.021, 0.006)	0.01	-1.14	33.52	0.263

## Sheet: Table S7. Global - Session Effe
Table S7. Linear Mixed-Effects Model Estimates of Session (Baseline vs. Post-Intervention) and Condition (Eyes-Closed vs. Eyes-Open) Effects on Confirmatory Global EEG Parameters With Covariates and FDR Correction
Specparam	Outcome	Term	N (ID/Obs)	Estimate (95% CI)	SE	t	df	p (uncorr.)		p (FDR)
Power	Theta (4-8 Hz)	Intercept	47 / 121	0.248 (-0.089, 0.584)	0.17	1.49	42.92	0.145		0.145
Power	Theta (4-8 Hz)	Session (V3)	47 / 121	0.062 (-0.007, 0.131)	0.03	1.8	80.19	0.075		0.226
Power	Theta (4-8 Hz)	Condition (EO)	47 / 121	-0.119 (-0.182, -0.056)	0.03	-3.78	77.13	< .001	***	< .001	***
Power	Theta (4-8 Hz)	Age	47 / 121	0.001 (-0.004, 0.007)	0	0.47	44.18	0.639		0.639
Power	Theta (4-8 Hz)	Sex (Male)	47 / 121	0.058 (-0.073, 0.190)	0.07	0.9	43.52	0.375		0.375
Power	Theta (4-8 Hz)	CPZ Equivalent	47 / 121	0.000 (0.000, 0.000)	0	3.6	42.34	< .001	***	0.003	**
Power	Theta (4-8 Hz)	Session (V3) × Condition (EO)	47 / 121	-0.042 (-0.139, 0.054)	0.05	-0.88	75.37	0.383		0.699
Center frequency	iAPF (8-12 Hz)	Intercept	55 / 177	11.240 (10.430, 12.050)	0.4	27.86	49.86	< .001	***	< .001	***
Center frequency	iAPF (8-12 Hz)	Session (V3)	55 / 177	-0.014 (-0.219, 0.190)	0.1	-0.14	122.51	0.889		0.98
Center frequency	iAPF (8-12 Hz)	Condition (EO)	55 / 177	0.279 (0.099, 0.460)	0.09	3.06	118.77	0.003	**	0.003	**
Center frequency	iAPF (8-12 Hz)	Age	55 / 177	-0.013 (-0.026, 0.001)	0.01	-1.88	47.85	0.066		0.199
Center frequency	iAPF (8-12 Hz)	Sex (Male)	55 / 177	-0.453 (-0.777, -0.130)	0.16	-2.82	49.34	0.007	**	0.017	*
Center frequency	iAPF (8-12 Hz)	CPZ Equivalent	55 / 177	-0.000 (-0.001, 0.000)	0	-1.26	47.93	0.214		0.233
Center frequency	iAPF (8-12 Hz)	Session (V3) × Condition (EO)	55 / 177	-0.046 (-0.328, 0.236)	0.14	-0.32	118	0.746		0.746
Exponent	Exponent (30-48 Hz)	Intercept	55 / 183	2.451 (1.652, 3.250)	0.4	6.16	52.51	< .001	***	< .001	***
Exponent	Exponent (30-48 Hz)	Session (V3)	55 / 183	-0.002 (-0.163, 0.159)	0.08	-0.03	129.56	0.98		0.98
Exponent	Exponent (30-48 Hz)	Condition (EO)	55 / 183	-0.281 (-0.420, -0.143)	0.07	-4.02	126.6	< .001	***	< .001	***
Exponent	Exponent (30-48 Hz)	Age	55 / 183	-0.008 (-0.021, 0.006)	0.01	-1.14	51.38	0.258		0.386
Exponent	Exponent (30-48 Hz)	Sex (Male)	55 / 183	-0.419 (-0.738, -0.100)	0.16	-2.64	52.2	0.011	*	0.017	*
Exponent	Exponent (30-48 Hz)	CPZ Equivalent	55 / 183	0.000 (-0.000, 0.001)	0	1.21	51.91	0.233		0.233
Exponent	Exponent (30-48 Hz)	Session (V3) × Condition (EO)	55 / 183	-0.080 (-0.298, 0.137)	0.11	-0.73	126.55	0.466		0.699

## Sheet: Table S8. Regional - Session Ef
Table S8. Linear Mixed-Effects Model Estimates of Session (Baseline vs. Post-Intervention) and Condition (EC vs. EO) Effects on Exploratory Regional EEG Parameters With Covariates and FDR Correction
Region	Specparam	Outcome	Term	N (ID/Obs)	Estimate (95% CI)	SE	t	df	p (uncorr.)
Frontal	Center frequency	iAPF (8-12 Hz)	Intercept	55 / 171	10.812 (9.827, 11.797)	0.49	22.07	48.86	< .001	***
Frontal	Center frequency	iAPF (8-12 Hz)	Session (V3)	55 / 171	-0.022 (-0.287, 0.242)	0.13	-0.17	116.48	0.867
Frontal	Center frequency	iAPF (8-12 Hz)	Condition (EO)	55 / 171	0.257 (0.022, 0.492)	0.12	2.17	111.31	0.032	*
Frontal	Center frequency	iAPF (8-12 Hz)	Age	55 / 171	-0.009 (-0.025, 0.007)	0.01	-1.12	46	0.268
Frontal	Center frequency	iAPF (8-12 Hz)	Sex (Male)	55 / 171	-0.327 (-0.718, 0.064)	0.19	-1.68	47.4	0.099
Frontal	Center frequency	iAPF (8-12 Hz)	CPZ Equivalent	55 / 171	-0.000 (-0.001, 0.000)	0	-0.95	44.97	0.35
Frontal	Center frequency	iAPF (8-12 Hz)	Session (V3) × Condition (EO)	55 / 171	-0.040 (-0.407, 0.328)	0.19	-0.21	110.63	0.832
Frontal	Exponent	Exponent (30-48 Hz)	Intercept	55 / 183	2.359 (1.408, 3.310)	0.47	4.98	52.83	< .001	***
Frontal	Exponent	Exponent (30-48 Hz)	Session (V3)	55 / 183	0.000 (-0.206, 0.206)	0.1	0	130.32	0.997
Frontal	Exponent	Exponent (30-48 Hz)	Condition (EO)	55 / 183	-0.325 (-0.502, -0.147)	0.09	-3.62	126.94	< .001	***
Frontal	Exponent	Exponent (30-48 Hz)	Age	55 / 183	-0.002 (-0.018, 0.014)	0.01	-0.28	51.51	0.779
Frontal	Exponent	Exponent (30-48 Hz)	Sex (Male)	55 / 183	-0.423 (-0.802, -0.043)	0.19	-2.23	52.45	0.03	*
Frontal	Exponent	Exponent (30-48 Hz)	CPZ Equivalent	55 / 183	0.000 (-0.000, 0.001)	0	0.8	52.12	0.43
Frontal	Exponent	Exponent (30-48 Hz)	Session (V3) × Condition (EO)	55 / 183	-0.148 (-0.427, 0.131)	0.14	-1.05	126.88	0.295
Frontal	Power	Theta (4-8 Hz)	Intercept	49 / 131	0.314 (-0.022, 0.650)	0.17	1.88	44.34	0.066
Frontal	Power	Theta (4-8 Hz)	Session (V3)	49 / 131	0.096 (0.006, 0.185)	0.04	2.13	90.3	0.036	*
Frontal	Power	Theta (4-8 Hz)	Condition (EO)	49 / 131	-0.107 (-0.188, -0.026)	0.04	-2.63	88.44	0.01	*
Frontal	Power	Theta (4-8 Hz)	Age	49 / 131	-0.001 (-0.007, 0.004)	0	-0.44	42.7	0.664
Frontal	Power	Theta (4-8 Hz)	Sex (Male)	49 / 131	0.088 (-0.044, 0.219)	0.07	1.34	44.69	0.187
Frontal	Power	Theta (4-8 Hz)	CPZ Equivalent	49 / 131	0.000 (0.000, 0.000)	0	3.67	42.71	< .001	***
Frontal	Power	Theta (4-8 Hz)	Session (V3) × Condition (EO)	49 / 131	-0.083 (-0.210, 0.045)	0.06	-1.29	86.7	0.201
Central	Center frequency	iAPF (8-12 Hz)	Intercept	55 / 172	11.170 (10.318, 12.021)	0.42	26.36	49.42	< .001	***
Central	Center frequency	iAPF (8-12 Hz)	Session (V3)	55 / 172	0.046 (-0.188, 0.280)	0.12	0.39	119.69	0.7
Central	Center frequency	iAPF (8-12 Hz)	Condition (EO)	55 / 172	0.281 (0.074, 0.488)	0.1	2.69	114.58	0.008	**
Central	Center frequency	iAPF (8-12 Hz)	Age	55 / 172	-0.013 (-0.027, 0.001)	0.01	-1.86	46.81	0.069
Central	Center frequency	iAPF (8-12 Hz)	Sex (Male)	55 / 172	-0.431 (-0.770, -0.092)	0.17	-2.56	48.55	0.014	*
Central	Center frequency	iAPF (8-12 Hz)	CPZ Equivalent	55 / 172	-0.000 (-0.001, 0.000)	0	-1.36	46.33	0.18
Central	Center frequency	iAPF (8-12 Hz)	Session (V3) × Condition (EO)	55 / 172	0.068 (-0.258, 0.393)	0.16	0.41	113.93	0.681
Central	Exponent	Exponent (30-48 Hz)	Intercept	55 / 183	3.238 (2.166, 4.310)	0.53	6.06	52.46	< .001	***
Central	Exponent	Exponent (30-48 Hz)	Session (V3)	55 / 183	-0.133 (-0.356, 0.089)	0.11	-1.18	129.71	0.239
Central	Exponent	Exponent (30-48 Hz)	Condition (EO)	55 / 183	-0.292 (-0.484, -0.101)	0.1	-3.02	126.57	0.003	**
Central	Exponent	Exponent (30-48 Hz)	Age	55 / 183	-0.011 (-0.029, 0.007)	0.01	-1.23	51.26	0.223
Central	Exponent	Exponent (30-48 Hz)	Sex (Male)	55 / 183	-0.514 (-0.942, -0.086)	0.21	-2.41	52.13	0.02	*
Central	Exponent	Exponent (30-48 Hz)	CPZ Equivalent	55 / 183	0.000 (-0.000, 0.001)	0	1.1	51.82	0.278
Central	Exponent	Exponent (30-48 Hz)	Session (V3) × Condition (EO)	55 / 183	0.031 (-0.270, 0.332)	0.15	0.21	126.51	0.838
Central	Power	Theta (4-8 Hz)	Intercept	51 / 140	0.406 (0.099, 0.712)	0.15	2.66	48.37	0.011	*
Central	Power	Theta (4-8 Hz)	Session (V3)	51 / 140	0.049 (-0.016, 0.115)	0.03	1.51	93.38	0.135
Central	Power	Theta (4-8 Hz)	Condition (EO)	51 / 140	-0.131 (-0.189, -0.073)	0.03	-4.47	90.53	< .001	***
Central	Power	Theta (4-8 Hz)	Age	51 / 140	-0.000 (-0.006, 0.005)	0	-0.12	47.95	0.902
Central	Power	Theta (4-8 Hz)	Sex (Male)	51 / 140	0.017 (-0.107, 0.141)	0.06	0.28	47.5	0.783
Central	Power	Theta (4-8 Hz)	CPZ Equivalent	51 / 140	0.000 (0.000, 0.000)	0	3.69	46.25	< .001	***
Central	Power	Theta (4-8 Hz)	Session (V3) × Condition (EO)	51 / 140	0.011 (-0.080, 0.102)	0.05	0.24	89.33	0.814
Parietal	Center frequency	iAPF (8-12 Hz)	Intercept	55 / 177	11.342 (10.523, 12.160)	0.41	27.84	49.58	< .001	***
Parietal	Center frequency	iAPF (8-12 Hz)	Session (V3)	55 / 177	-0.100 (-0.362, 0.162)	0.13	-0.75	125.73	0.452
Parietal	Center frequency	iAPF (8-12 Hz)	Condition (EO)	55 / 177	0.246 (0.017, 0.475)	0.12	2.12	119.23	0.036	*
Parietal	Center frequency	iAPF (8-12 Hz)	Age	55 / 177	-0.015 (-0.029, -0.002)	0.01	-2.25	46.56	0.029	*
Parietal	Center frequency	iAPF (8-12 Hz)	Sex (Male)	55 / 177	-0.328 (-0.653, -0.004)	0.16	-2.03	48.05	0.048	*
Parietal	Center frequency	iAPF (8-12 Hz)	CPZ Equivalent	55 / 177	-0.000 (-0.001, 0.000)	0	-1.56	46.22	0.126
Parietal	Center frequency	iAPF (8-12 Hz)	Session (V3) × Condition (EO)	55 / 177	0.070 (-0.291, 0.431)	0.18	0.38	118.56	0.702
Parietal	Exponent	Exponent (30-48 Hz)	Intercept	55 / 183	3.291 (2.366, 4.216)	0.46	7.14	52.27	< .001	***
Parietal	Exponent	Exponent (30-48 Hz)	Session (V3)	55 / 183	-0.043 (-0.224, 0.139)	0.09	-0.46	129.19	0.644
Parietal	Exponent	Exponent (30-48 Hz)	Condition (EO)	55 / 183	-0.449 (-0.606, -0.293)	0.08	-5.68	126.36	< .001	***
Parietal	Exponent	Exponent (30-48 Hz)	Age	55 / 183	-0.008 (-0.024, 0.007)	0.01	-1.06	51.19	0.294
Parietal	Exponent	Exponent (30-48 Hz)	Sex (Male)	55 / 183	-0.645 (-1.014, -0.275)	0.18	-3.5	51.98	< .001	***
Parietal	Exponent	Exponent (30-48 Hz)	CPZ Equivalent	55 / 183	0.000 (-0.000, 0.001)	0	1.19	51.7	0.239
Parietal	Exponent	Exponent (30-48 Hz)	Session (V3) × Condition (EO)	55 / 183	-0.045 (-0.291, 0.201)	0.12	-0.36	126.3	0.716
Parietal	Power	Theta (4-8 Hz)	Intercept	45 / 107	0.247 (-0.190, 0.683)	0.22	1.14	40.18	0.26
Parietal	Power	Theta (4-8 Hz)	Session (V3)	45 / 107	0.028 (-0.061, 0.116)	0.04	0.63	68.12	0.534
Parietal	Power	Theta (4-8 Hz)	Condition (EO)	45 / 107	-0.165 (-0.246, -0.084)	0.04	-4.07	65.05	< .001	***
Parietal	Power	Theta (4-8 Hz)	Age	45 / 107	0.004 (-0.003, 0.011)	0	1.18	40.93	0.245
Parietal	Power	Theta (4-8 Hz)	Sex (Male)	45 / 107	0.013 (-0.158, 0.183)	0.08	0.15	41.45	0.882
Parietal	Power	Theta (4-8 Hz)	CPZ Equivalent	45 / 107	0.000 (0.000, 0.001)	0	3.03	40.18	0.004	**
Parietal	Power	Theta (4-8 Hz)	Session (V3) × Condition (EO)	45 / 107	0.008 (-0.122, 0.139)	0.07	0.12	65.21	0.902
Left Temporal	Center frequency	iAPF (8-12 Hz)	Intercept	55 / 174	11.424 (10.569, 12.279)	0.43	26.84	50.23	< .001	***
Left Temporal	Center frequency	iAPF (8-12 Hz)	Session (V3)	55 / 174	-0.020 (-0.229, 0.189)	0.11	-0.19	120.33	0.852
Left Temporal	Center frequency	iAPF (8-12 Hz)	Condition (EO)	55 / 174	0.233 (0.048, 0.417)	0.09	2.5	116.64	0.014	*
Left Temporal	Center frequency	iAPF (8-12 Hz)	Age	55 / 174	-0.015 (-0.029, -0.001)	0.01	-2.1	48.12	0.041	*
Left Temporal	Center frequency	iAPF (8-12 Hz)	Sex (Male)	55 / 174	-0.501 (-0.842, -0.159)	0.17	-2.95	49.62	0.005	**
Left Temporal	Center frequency	iAPF (8-12 Hz)	CPZ Equivalent	55 / 174	-0.000 (-0.001, 0.000)	0	-1.28	48.07	0.206
Left Temporal	Center frequency	iAPF (8-12 Hz)	Session (V3) × Condition (EO)	55 / 174	-0.127 (-0.414, 0.160)	0.15	-0.88	115.68	0.383
Left Temporal	Exponent	Exponent (30-48 Hz)	Intercept	55 / 183	2.197 (1.414, 2.980)	0.39	5.63	52.31	< .001	***
Left Temporal	Exponent	Exponent (30-48 Hz)	Session (V3)	55 / 183	0.085 (-0.118, 0.287)	0.1	0.83	131.31	0.411
Left Temporal	Exponent	Exponent (30-48 Hz)	Condition (EO)	55 / 183	-0.255 (-0.430, -0.080)	0.09	-2.88	126.6	0.005	**
Left Temporal	Exponent	Exponent (30-48 Hz)	Age	55 / 183	-0.010 (-0.023, 0.004)	0.01	-1.47	50.43	0.149
Left Temporal	Exponent	Exponent (30-48 Hz)	Sex (Male)	55 / 183	-0.410 (-0.723, -0.098)	0.16	-2.64	51.7	0.011	*
Left Temporal	Exponent	Exponent (30-48 Hz)	CPZ Equivalent	55 / 183	0.000 (-0.000, 0.001)	0	1.39	51.26	0.172
Left Temporal	Exponent	Exponent (30-48 Hz)	Session (V3) × Condition (EO)	55 / 183	-0.192 (-0.468, 0.083)	0.14	-1.38	126.51	0.17
Left Temporal	Power	Theta (4-8 Hz)	Intercept	42 / 106	0.166 (-0.200, 0.533)	0.18	0.92	38.04	0.364
Left Temporal	Power	Theta (4-8 Hz)	Session (V3)	42 / 106	0.080 (-0.007, 0.168)	0.04	1.83	68.63	0.072
Left Temporal	Power	Theta (4-8 Hz)	Condition (EO)	42 / 106	-0.124 (-0.201, -0.048)	0.04	-3.25	66.54	0.002	**
Left Temporal	Power	Theta (4-8 Hz)	Age	42 / 106	0.000 (-0.006, 0.006)	0	0.12	38.5	0.906
Left Temporal	Power	Theta (4-8 Hz)	Sex (Male)	42 / 106	0.108 (-0.040, 0.256)	0.07	1.48	38.95	0.146
Left Temporal	Power	Theta (4-8 Hz)	CPZ Equivalent	42 / 106	0.000 (0.000, 0.000)	0	3.12	36.61	0.004	**
Left Temporal	Power	Theta (4-8 Hz)	Session (V3) × Condition (EO)	42 / 106	0.006 (-0.114, 0.127)	0.06	0.11	66.12	0.917
Right Temporal	Center frequency	iAPF (8-12 Hz)	Intercept	55 / 178	11.260 (10.444, 12.077)	0.41	27.71	49.76	< .001	***
Right Temporal	Center frequency	iAPF (8-12 Hz)	Session (V3)	55 / 178	-0.033 (-0.265, 0.199)	0.12	-0.28	125.42	0.778
Right Temporal	Center frequency	iAPF (8-12 Hz)	Condition (EO)	55 / 178	0.267 (0.060, 0.474)	0.1	2.55	120.99	0.012	*
Right Temporal	Center frequency	iAPF (8-12 Hz)	Age	55 / 178	-0.012 (-0.026, 0.001)	0.01	-1.84	47.52	0.072
Right Temporal	Center frequency	iAPF (8-12 Hz)	Sex (Male)	55 / 178	-0.456 (-0.782, -0.129)	0.16	-2.81	49.28	0.007	**
Right Temporal	Center frequency	iAPF (8-12 Hz)	CPZ Equivalent	55 / 178	-0.000 (-0.001, 0.000)	0	-1.09	47.99	0.282
Right Temporal	Center frequency	iAPF (8-12 Hz)	Session (V3) × Condition (EO)	55 / 178	-0.116 (-0.436, 0.204)	0.16	-0.72	119.97	0.474
Right Temporal	Exponent	Exponent (30-48 Hz)	Intercept	55 / 183	2.408 (1.548, 3.267)	0.43	5.62	52.73	< .001	***
Right Temporal	Exponent	Exponent (30-48 Hz)	Session (V3)	55 / 183	0.024 (-0.169, 0.217)	0.1	0.25	130.49	0.805
Right Temporal	Exponent	Exponent (30-48 Hz)	Condition (EO)	55 / 183	-0.277 (-0.444, -0.111)	0.08	-3.3	126.87	0.001	**
Right Temporal	Exponent	Exponent (30-48 Hz)	Age	55 / 183	-0.012 (-0.026, 0.002)	0.01	-1.66	51.31	0.103
Right Temporal	Exponent	Exponent (30-48 Hz)	Sex (Male)	55 / 183	-0.417 (-0.760, -0.074)	0.17	-2.44	52.31	0.018	*
Right Temporal	Exponent	Exponent (30-48 Hz)	CPZ Equivalent	55 / 183	0.000 (-0.000, 0.001)	0	1.44	51.96	0.156
Right Temporal	Exponent	Exponent (30-48 Hz)	Session (V3) × Condition (EO)	55 / 183	-0.050 (-0.312, 0.211)	0.13	-0.38	126.8	0.703
Right Temporal	Power	Theta (4-8 Hz)	Intercept	43 / 107	0.174 (-0.194, 0.542)	0.18	0.95	40.27	0.345
Right Temporal	Power	Theta (4-8 Hz)	Session (V3)	43 / 107	0.074 (-0.007, 0.155)	0.04	1.82	70.26	0.073
Right Temporal	Power	Theta (4-8 Hz)	Condition (EO)	43 / 107	-0.117 (-0.187, -0.047)	0.04	-3.33	67.69	0.001	**
Right Temporal	Power	Theta (4-8 Hz)	Age	43 / 107	0.002 (-0.004, 0.008)	0	0.58	40.29	0.568
Right Temporal	Power	Theta (4-8 Hz)	Sex (Male)	43 / 107	0.068 (-0.076, 0.212)	0.07	0.95	40.28	0.348
Right Temporal	Power	Theta (4-8 Hz)	CPZ Equivalent	43 / 107	0.000 (0.000, 0.001)	0	3.55	38.19	0.001	**
Right Temporal	Power	Theta (4-8 Hz)	Session (V3) × Condition (EO)	43 / 107	-0.064 (-0.174, 0.046)	0.06	-1.16	66.48	0.249
Occipital	Center frequency	iAPF (8-12 Hz)	Intercept	55 / 177	10.957 (10.065, 11.849)	0.44	24.67	51.06	< .001	***
Occipital	Center frequency	iAPF (8-12 Hz)	Session (V3)	55 / 177	-0.068 (-0.365, 0.229)	0.15	-0.45	127.75	0.652
Occipital	Center frequency	iAPF (8-12 Hz)	Condition (EO)	55 / 177	0.379 (0.120, 0.638)	0.13	2.9	120.94	0.004	**
Occipital	Center frequency	iAPF (8-12 Hz)	Age	55 / 177	-0.010 (-0.024, 0.005)	0.01	-1.3	47.87	0.199
Occipital	Center frequency	iAPF (8-12 Hz)	Sex (Male)	55 / 177	-0.347 (-0.700, 0.006)	0.18	-1.97	49.14	0.054
Occipital	Center frequency	iAPF (8-12 Hz)	CPZ Equivalent	55 / 177	-0.000 (-0.001, 0.000)	0	-1.35	47.87	0.183
Occipital	Center frequency	iAPF (8-12 Hz)	Session (V3) × Condition (EO)	55 / 177	-0.134 (-0.544, 0.277)	0.21	-0.65	122.01	0.52
Occipital	Exponent	Exponent (30-48 Hz)	Intercept	55 / 183	1.356 (0.559, 2.152)	0.4	3.41	52.26	0.001	**
Occipital	Exponent	Exponent (30-48 Hz)	Session (V3)	55 / 183	0.106 (-0.086, 0.298)	0.1	1.09	130.62	0.277
Occipital	Exponent	Exponent (30-48 Hz)	Condition (EO)	55 / 183	-0.304 (-0.470, -0.138)	0.08	-3.62	126.48	< .001	***
Occipital	Exponent	Exponent (30-48 Hz)	Age	55 / 183	0.001 (-0.012, 0.014)	0.01	0.15	50.64	0.878
Occipital	Exponent	Exponent (30-48 Hz)	Sex (Male)	55 / 183	-0.238 (-0.556, 0.080)	0.16	-1.5	51.77	0.139
Occipital	Exponent	Exponent (30-48 Hz)	CPZ Equivalent	55 / 183	0.000 (-0.000, 0.001)	0	0.7	51.37	0.485
Occipital	Exponent	Exponent (30-48 Hz)	Session (V3) × Condition (EO)	55 / 183	-0.076 (-0.336, 0.185)	0.13	-0.58	126.4	0.566
Occipital	Power	Theta (4-8 Hz)	Intercept	54 / 136	0.289 (-0.028, 0.606)	0.16	1.84	47.42	0.073
Occipital	Power	Theta (4-8 Hz)	Session (V3)	54 / 136	0.091 (0.007, 0.174)	0.04	2.15	89.46	0.034	*
Occipital	Power	Theta (4-8 Hz)	Condition (EO)	54 / 136	-0.137 (-0.215, -0.058)	0.04	-3.46	90.07	< .001	***
Occipital	Power	Theta (4-8 Hz)	Age	54 / 136	0.000 (-0.005, 0.006)	0	0.14	48.81	0.888
Occipital	Power	Theta (4-8 Hz)	Sex (Male)	54 / 136	0.050 (-0.075, 0.175)	0.06	0.8	48.78	0.427
Occipital	Power	Theta (4-8 Hz)	CPZ Equivalent	54 / 136	0.000 (0.000, 0.000)	0	2.76	50.03	0.008	**
Occipital	Power	Theta (4-8 Hz)	Session (V3) × Condition (EO)	54 / 136	-0.083 (-0.206, 0.040)	0.06	-1.34	86.43	0.183

## Sheet: Table S9. Global - Delta Clinic
Table S9. Linear Mixed-Effects Model Results Examining Associations Between Changes in Clinical Measures and Changes in Confirmatory Spectral Parameters, Including Covariates and FDR Correction
Clinical	Specparam	Outcome	Term	N (ID/Obs)	Estimate (95% CI)	SE	t	df	p (uncorr.)		p (FDR)
Cognition	Power	ΔTheta (4-8 Hz)	Intercept	22 / 37	-0.052 (-0.298, 0.193)	0.12	-0.45	18.43	0.66		0.983
Cognition	Power	ΔTheta (4-8 Hz)	ΔBACS composite z	22 / 37	0.011 (-0.126, 0.147)	0.07	0.16	22.06	0.873		0.873
Cognition	Power	ΔTheta (4-8 Hz)	Condition (EO)	22 / 37	-0.062 (-0.127, 0.003)	0.03	-2.04	13.53	0.062		0.117
Cognition	Power	ΔTheta (4-8 Hz)	Age	22 / 37	0.001 (-0.004, 0.006)	0	0.4	17.82	0.696		0.696
Cognition	Power	ΔTheta (4-8 Hz)	Sex (Male)	22 / 37	0.056 (-0.078, 0.191)	0.06	0.88	16.79	0.389		0.389
Cognition	Power	ΔTheta (4-8 Hz)	CPZ Equivalent	22 / 37	0.000 (-0.000, 0.000)	0	1.08	17.85	0.292		0.682
Cognition	Power	ΔTheta (4-8 Hz)	ΔBACS composite z × Condition (EO)	22 / 37	0.060 (-0.032, 0.153)	0.04	1.41	13.88	0.181		0.271
Cognition	Center frequency	ΔiAPF (8-12 Hz)	Intercept	35 / 65	-0.006 (-0.601, 0.588)	0.29	-0.02	33.24	0.983		0.983
Cognition	Center frequency	ΔiAPF (8-12 Hz)	ΔBACS composite z	35 / 65	0.366 (-0.009, 0.741)	0.19	1.96	53.49	0.055		0.166
Cognition	Center frequency	ΔiAPF (8-12 Hz)	Condition (EO)	35 / 65	0.244 (-0.029, 0.517)	0.13	1.83	29.34	0.078		0.117
Cognition	Center frequency	ΔiAPF (8-12 Hz)	Age	35 / 65	-0.004 (-0.016, 0.008)	0.01	-0.68	29.6	0.503		0.696
Cognition	Center frequency	ΔiAPF (8-12 Hz)	Sex (Male)	35 / 65	-0.237 (-0.532, 0.058)	0.14	-1.65	28.31	0.111		0.333
Cognition	Center frequency	ΔiAPF (8-12 Hz)	CPZ Equivalent	35 / 65	0.000 (-0.000, 0.001)	0	0.52	27.4	0.606		0.682
Cognition	Center frequency	ΔiAPF (8-12 Hz)	ΔBACS composite z × Condition (EO)	35 / 65	-0.504 (-0.927, -0.082)	0.21	-2.43	30.99	0.021	*	0.063
Cognition	Exponent	ΔExponent (30-48 Hz)	Intercept	35 / 69	-0.821 (-1.538, -0.103)	0.35	-2.33	32.29	0.026	*	0.079
Cognition	Exponent	ΔExponent (30-48 Hz)	ΔBACS composite z	35 / 69	0.298 (-0.130, 0.726)	0.21	1.4	49.62	0.168		0.252
Cognition	Exponent	ΔExponent (30-48 Hz)	Condition (EO)	35 / 69	0.038 (-0.209, 0.286)	0.12	0.31	31.87	0.755		0.755
Cognition	Exponent	ΔExponent (30-48 Hz)	Age	35 / 69	0.014 (-0.001, 0.028)	0.01	1.95	29.94	0.06		0.181
Cognition	Exponent	ΔExponent (30-48 Hz)	Sex (Male)	35 / 69	0.173 (-0.190, 0.537)	0.18	0.97	29.36	0.338		0.389
Cognition	Exponent	ΔExponent (30-48 Hz)	CPZ Equivalent	35 / 69	0.000 (-0.000, 0.001)	0	0.41	29.33	0.682		0.682
Cognition	Exponent	ΔExponent (30-48 Hz)	ΔBACS composite z × Condition (EO)	35 / 69	-0.208 (-0.602, 0.186)	0.19	-1.07	33.49	0.29		0.29
Symptoms	Power	ΔTheta (4-8 Hz)	Intercept	22 / 37	-0.033 (-0.254, 0.188)	0.11	-0.31	17.66	0.76		0.76
Symptoms	Power	ΔTheta (4-8 Hz)	ΔPANSS pos	22 / 37	-0.016 (-0.041, 0.010)	0.01	-1.29	19.45	0.211		0.586
Symptoms	Power	ΔTheta (4-8 Hz)	Condition (EO)	22 / 37	-0.041 (-0.096, 0.013)	0.03	-1.62	14.19	0.127		0.38
Symptoms	Power	ΔTheta (4-8 Hz)	Age	22 / 37	0.001 (-0.004, 0.006)	0	0.51	17.58	0.614		0.614
Symptoms	Power	ΔTheta (4-8 Hz)	Sex (Male)	22 / 37	0.054 (-0.073, 0.181)	0.06	0.9	16.62	0.382		0.382
Symptoms	Power	ΔTheta (4-8 Hz)	CPZ Equivalent	22 / 37	0.000 (-0.000, 0.000)	0	0.55	17.25	0.591		0.591
Symptoms	Power	ΔTheta (4-8 Hz)	ΔPANSS pos × Condition (EO)	22 / 37	-0.011 (-0.041, 0.020)	0.01	-0.75	16.35	0.465		0.465
Symptoms	Center frequency	ΔiAPF (8-12 Hz)	Intercept	36 / 67	0.133 (-0.416, 0.682)	0.27	0.49	32.26	0.624		0.76
Symptoms	Center frequency	ΔiAPF (8-12 Hz)	ΔPANSS pos	36 / 67	-0.005 (-0.067, 0.056)	0.03	-0.17	53.27	0.864		0.864
Symptoms	Center frequency	ΔiAPF (8-12 Hz)	Condition (EO)	36 / 67	0.077 (-0.146, 0.300)	0.11	0.7	31.26	0.487		0.487
Symptoms	Center frequency	ΔiAPF (8-12 Hz)	Age	36 / 67	-0.004 (-0.015, 0.008)	0.01	-0.67	30.23	0.51		0.614
Symptoms	Center frequency	ΔiAPF (8-12 Hz)	Sex (Male)	36 / 67	-0.252 (-0.534, 0.029)	0.14	-1.83	29.43	0.077		0.23
Symptoms	Center frequency	ΔiAPF (8-12 Hz)	CPZ Equivalent	36 / 67	0.000 (-0.000, 0.001)	0	0.7	28.73	0.492		0.591
Symptoms	Center frequency	ΔiAPF (8-12 Hz)	ΔPANSS pos × Condition (EO)	36 / 67	0.057 (-0.018, 0.131)	0.04	1.56	30.39	0.13		0.195
Symptoms	Exponent	ΔExponent (30-48 Hz)	Intercept	36 / 71	-0.657 (-1.341, 0.027)	0.34	-1.96	31.6	0.059		0.178
Symptoms	Exponent	ΔExponent (30-48 Hz)	ΔPANSS pos	36 / 71	0.031 (-0.041, 0.103)	0.04	0.87	44.97	0.39		0.586
Symptoms	Exponent	ΔExponent (30-48 Hz)	Condition (EO)	36 / 71	-0.076 (-0.267, 0.115)	0.09	-0.81	32.75	0.424		0.487
Symptoms	Exponent	ΔExponent (30-48 Hz)	Age	36 / 71	0.013 (-0.001, 0.027)	0.01	1.84	30.63	0.075		0.225
Symptoms	Exponent	ΔExponent (30-48 Hz)	Sex (Male)	36 / 71	0.168 (-0.188, 0.523)	0.17	0.96	30.4	0.343		0.382
Symptoms	Exponent	ΔExponent (30-48 Hz)	CPZ Equivalent	36 / 71	0.000 (-0.000, 0.001)	0	0.57	30.59	0.57		0.591
Symptoms	Exponent	ΔExponent (30-48 Hz)	ΔPANSS pos × Condition (EO)	36 / 71	-0.056 (-0.121, 0.009)	0.03	-1.75	32.76	0.09		0.195
Symptoms	Power	ΔTheta (4-8 Hz)	Intercept	22 / 37	-0.039 (-0.277, 0.198)	0.11	-0.35	17.63	0.732		0.732
Symptoms	Power	ΔTheta (4-8 Hz)	ΔPANSS neg	22 / 37	0.004 (-0.020, 0.027)	0.01	0.32	19.15	0.756		0.952
Symptoms	Power	ΔTheta (4-8 Hz)	Condition (EO)	22 / 37	-0.028 (-0.078, 0.023)	0.02	-1.18	13.91	0.258		0.775
Symptoms	Power	ΔTheta (4-8 Hz)	Age	22 / 37	0.001 (-0.005, 0.006)	0	0.3	17.55	0.771		0.771
Symptoms	Power	ΔTheta (4-8 Hz)	Sex (Male)	22 / 37	0.040 (-0.095, 0.175)	0.06	0.63	16.84	0.539		0.539
Symptoms	Power	ΔTheta (4-8 Hz)	CPZ Equivalent	22 / 37	0.000 (-0.000, 0.000)	0	1.37	17.69	0.189		0.567
Symptoms	Power	ΔTheta (4-8 Hz)	ΔPANSS neg × Condition (EO)	22 / 37	0.006 (-0.008, 0.021)	0.01	0.9	13.27	0.383		0.603
Symptoms	Center frequency	ΔiAPF (8-12 Hz)	Intercept	36 / 67	0.173 (-0.375, 0.721)	0.27	0.64	32.62	0.525		0.732
Symptoms	Center frequency	ΔiAPF (8-12 Hz)	ΔPANSS neg	36 / 67	-0.012 (-0.067, 0.043)	0.03	-0.44	55.35	0.66		0.952
Symptoms	Center frequency	ΔiAPF (8-12 Hz)	Condition (EO)	36 / 67	0.016 (-0.207, 0.239)	0.11	0.15	31.75	0.885		0.903
Symptoms	Center frequency	ΔiAPF (8-12 Hz)	Age	36 / 67	-0.005 (-0.016, 0.007)	0.01	-0.85	30.72	0.403		0.604
Symptoms	Center frequency	ΔiAPF (8-12 Hz)	Sex (Male)	36 / 67	-0.226 (-0.509, 0.056)	0.14	-1.64	29.59	0.112		0.335
Symptoms	Center frequency	ΔiAPF (8-12 Hz)	CPZ Equivalent	36 / 67	0.000 (-0.000, 0.000)	0	0.48	28.98	0.633		0.633
Symptoms	Center frequency	ΔiAPF (8-12 Hz)	ΔPANSS neg × Condition (EO)	36 / 67	-0.018 (-0.088, 0.052)	0.03	-0.53	30.91	0.603		0.603
Symptoms	Exponent	ΔExponent (30-48 Hz)	Intercept	36 / 71	-0.677 (-1.358, 0.004)	0.33	-2.03	31.5	0.051		0.154
Symptoms	Exponent	ΔExponent (30-48 Hz)	ΔPANSS neg	36 / 71	-0.002 (-0.066, 0.062)	0.03	-0.06	46.88	0.952		0.952
Symptoms	Exponent	ΔExponent (30-48 Hz)	Condition (EO)	36 / 71	-0.012 (-0.204, 0.181)	0.09	-0.12	32.78	0.903		0.903
Symptoms	Exponent	ΔExponent (30-48 Hz)	Age	36 / 71	0.013 (-0.001, 0.027)	0.01	1.87	30.59	0.071		0.213
Symptoms	Exponent	ΔExponent (30-48 Hz)	Sex (Male)	36 / 71	0.163 (-0.194, 0.519)	0.17	0.93	30.3	0.358		0.537
Symptoms	Exponent	ΔExponent (30-48 Hz)	CPZ Equivalent	36 / 71	0.000 (-0.000, 0.001)	0	0.59	30.53	0.561		0.633
Symptoms	Exponent	ΔExponent (30-48 Hz)	ΔPANSS neg × Condition (EO)	36 / 71	0.018 (-0.044, 0.079)	0.03	0.58	32.5	0.563		0.603
Symptoms	Power	ΔTheta (4-8 Hz)	Intercept	22 / 37	-0.047 (-0.283, 0.190)	0.11	-0.42	17.73	0.683		0.683
Symptoms	Power	ΔTheta (4-8 Hz)	ΔPANSS gen	22 / 37	-0.002 (-0.018, 0.013)	0.01	-0.3	19.17	0.765		0.765
Symptoms	Power	ΔTheta (4-8 Hz)	Condition (EO)	22 / 37	-0.031 (-0.084, 0.022)	0.02	-1.24	14.06	0.235		0.374
Symptoms	Power	ΔTheta (4-8 Hz)	Age	22 / 37	0.001 (-0.004, 0.006)	0	0.41	17.61	0.684		0.684
Symptoms	Power	ΔTheta (4-8 Hz)	Sex (Male)	22 / 37	0.048 (-0.087, 0.183)	0.06	0.75	16.82	0.463		0.486
Symptoms	Power	ΔTheta (4-8 Hz)	CPZ Equivalent	22 / 37	0.000 (-0.000, 0.000)	0	1.06	17.42	0.304		0.467
Symptoms	Power	ΔTheta (4-8 Hz)	ΔPANSS gen × Condition (EO)	22 / 37	0.002 (-0.019, 0.023)	0.01	0.2	15.95	0.846		0.85
Symptoms	Center frequency	ΔiAPF (8-12 Hz)	Intercept	36 / 67	0.227 (-0.315, 0.768)	0.27	0.85	32.42	0.4		0.6
Symptoms	Center frequency	ΔiAPF (8-12 Hz)	ΔPANSS gen	36 / 67	-0.015 (-0.055, 0.026)	0.02	-0.74	54.65	0.463		0.695
Symptoms	Center frequency	ΔiAPF (8-12 Hz)	Condition (EO)	36 / 67	0.021 (-0.206, 0.247)	0.11	0.19	31.74	0.854		0.854
Symptoms	Center frequency	ΔiAPF (8-12 Hz)	Age	36 / 67	-0.006 (-0.017, 0.005)	0.01	-1.06	30.4	0.3		0.449
Symptoms	Center frequency	ΔiAPF (8-12 Hz)	Sex (Male)	36 / 67	-0.213 (-0.495, 0.069)	0.14	-1.54	29.47	0.133		0.4
Symptoms	Center frequency	ΔiAPF (8-12 Hz)	CPZ Equivalent	36 / 67	0.000 (-0.000, 0.000)	0	0.23	28.7	0.823		0.823
Symptoms	Center frequency	ΔiAPF (8-12 Hz)	ΔPANSS gen × Condition (EO)	36 / 67	-0.005 (-0.055, 0.045)	0.02	-0.19	29.85	0.85		0.85
Symptoms	Exponent	ΔExponent (30-48 Hz)	Intercept	36 / 71	-0.701 (-1.345, -0.058)	0.32	-2.22	31.39	0.034	*	0.101
Symptoms	Exponent	ΔExponent (30-48 Hz)	ΔPANSS gen	36 / 71	0.070 (0.026, 0.114)	0.02	3.21	42.77	0.003	**	0.008	**
Symptoms	Exponent	ΔExponent (30-48 Hz)	Condition (EO)	36 / 71	-0.093 (-0.256, 0.069)	0.08	-1.17	32.78	0.25		0.374
Symptoms	Exponent	ΔExponent (30-48 Hz)	Age	36 / 71	0.015 (0.001, 0.028)	0.01	2.22	30.68	0.034	*	0.102
Symptoms	Exponent	ΔExponent (30-48 Hz)	Sex (Male)	36 / 71	0.118 (-0.223, 0.459)	0.17	0.71	30.43	0.486		0.486
Symptoms	Exponent	ΔExponent (30-48 Hz)	CPZ Equivalent	36 / 71	0.000 (-0.000, 0.001)	0	1.03	30.62	0.312		0.467
Symptoms	Exponent	ΔExponent (30-48 Hz)	ΔPANSS gen × Condition (EO)	36 / 71	-0.069 (-0.106, -0.032)	0.02	-3.79	32.64	< .001	***	0.002	**

[truncated: 3 more sheets: Table S10. Global - Delta Post-, Table S11. Regional - Delta Cli, Table S12. Regional - Delta Pos]
